# Supplementary material for: First-Day Glycemic Exposure and 28-Day Mortality in the ICU: A Multicohort Study
Source: Research Square preprint supplement (doi:10.21203/rs.3.rs-9710742/v1), 2026-06-11
Supplement: Supplementary file 1 [file 247afc0cbe9476c876ea940a.docx]

## **Supplement**

## **eMethods**

**Data Source, Setting, and Governance**

Clinical data for this study were stored in the Bridge2AI CHoRUS AIM-AHEAD60 database, which was developed using the OMOP Common Data Model. Data extraction was performed using PostgreSQL, and variable exploration was conducted using ATLAS and ARES across OMOP tables. All analyses were conducted in Python 3.10 using libraries for data processing (numpy, pandas), modeling (torch, pycox, xgboost, statsmodels, sklearn, scipy.stats), and visualization (matplotlib, seaborn).

We analyzed adult ICU patients aged 18 to 105 years. From 18,868 unique ICU admissions, we retained 8,048 patients who had at least one glucose measurement during the first 24 hours of ICU care, restricted to the index ICU encounter and a hospital length of stay of at least 24 hours. The cohort assembly process and inclusion criteria are illustrated in Figure 1.

**Cohort Assembly and Participant Flow**

We included adults aged 18–105 years with a hospital length of stay (LOS) ≥24 hours and ≥1 glucose value during the first ICU day. Among 18,868 unique ICU admissions, we restricted to the index ICU encounter per patient, yielding 8,048 patients for analysis. A flow diagram with inclusion/exclusion counts and reasons appears in Figure 1.

**Glycemic Exposure and Feature Engineering**

Glycemic exposure was summarized using time‑weighted average (TWA) glucose during the first 24 hours of ICU admission. Glucose values were standardized to mg/dL, sorted chronologically, and treated as a step function, whereby each observed value was assumed to persist until the next measurement. The duration associated with each glucose value was used to compute weighted averages that account for both magnitude and timing of measurements.

Patients were categorized into clinically relevant glucose bins: <100 mg/dL, 100–139 mg/dL (reference), 140–179 mg/dL, and ≥180 mg/dL. For descriptive analyses, glucose was also categorized as hypoglycemic (<70 mg/dL), euglycemic (70–180 mg/dL), or hyperglycemic (>180 mg/dL). These bin definitions were prespecified to align with common ICU glycemic targets.

Additional physiologic variables were derived using clinically informed aggregation rules. Hemodynamic variables were summarized using time‑weighted averages with coverage adjustment. Laboratory values reflecting metabolic, renal, hepatic, and hematologic function were summarized using extreme (minimum or maximum) values within the first 24 hours, . For electrolytes and acid–base markers, we computed the worst absolute deviation from normal, along with the actual extreme value and its timestamp. Comorbidities and treatment exposures (e.g., diabetes, insulin, corticosteroids, vasopressors) were encoded as binary indicators. Glucose monitoring intensity was captured using the number of glucose measurements and cumulative early glycemic exposure to mitigate bias from differential measurement frequency.

# The following equations were used:

## **Time-Weighted Average (TWA):**

TWA = Σ(v_i × (t_{i+1} − t_i)) / Σ(t_{i+1} − t_i), where t_{n+1} = end of 24h window.

## **Worst Deviation from Normal:**

Worst deviation = max |v_i − N|, where N is the normal reference value.

Also record worst value and timestamp of occurrence.

## **Coverage Metrics:**

Coverage hours = Σ(t_{i+1} − t_i); Proportion covered = Coverage hours / 24.

# Variable groups and aggregation rules included the following:

| **Domain** | **Variable Examples** | **Rule** | **Clinical Rationale** |
| --- | --- | --- | --- |
| Glucose Control | time_weighted_glucose | TWA | Captures glycemic exposure robustly |
| Hemodynamics | twa_systolic_bp, twa_diastolic_bp | TWA + coverage | Reflects BP trends and measurement density |
| Temperature & Oxygenation | worst_body_temperature, worst_oxygen_sat | Max / Min | Fever burden, hypoxemia severity |
| Electrolytes & Acid-Base | worst_dev_*, worst_value_*, worst_time_* | Worst deviation | Detects hypo/hyper states and timing |
| Renal & Hepatic | worst_creatinine, sum_urine_output | Max / Sum | AKI risk and fluid balance |
| Hematology | worst_hemoglobin, worst_platelets | Min / Max | Anemia and bleeding risk |
| Anthropometrics | last_weight, last_height | Last | Dosing and nutritional assessment |
| Comorbidities | aki, copd, diabetes, etc. | Binary flags | Baseline risk adjustment |

**Handling missing data**

Variables with more than 30% missingness were excluded. Remaining missing values were addressed using Multiple Imputation by Chained Equations (MICE) under a missing‑at‑random assumption, a widely used approach for handling incomplete clinical datasets in machine learning applications for ICU populations. This method iteratively models each variable with missing data as a function of other variables, producing multiple plausible imputations that preserve the underlying data structure and variability.1,2 The imputation model incorporated demographic characteristics, clinical covariates, glycemic measures, and outcome status to preserve associations with mortality.

A subset of patients (n = 158) lacked complete timestamps for their initial glucose measurement, preventing direct calculation of time‑weighted metrics. These patients were retained, and missing time‑weighted glucose values were imputed using auxiliary clinical variables and available glycemic data.

**Descriptive and Comparative Analyses**

The baseline table was constructed by aggregating patient-level data and comparing characteristics between outcome groups (such as alive at 28 days vs. died by 28 days). Continuous variables were summarized using mean ± standard deviation, median with interquartile range (IQR), and assessed for normality via the Shapiro–Wilk test. Welch’s t-test was applied for approximately normal distributions, while the Mann–Whitney U test was used for skewed variables. Effect sizes were reported as Cohen’s d and Hedges’ g. Binary and categorical variables were presented as counts and percentages, with group differences evaluated using χ² square or Fisher’s exact tests, depending on expected cell counts. Odds ratios (OR) with 95% confidence intervals on 28-day survival were calculated for binary features. Risk ratio (RR) tables were generated for categorical exposures (such as glucose category, race, ethnicity, and gender) and binary exposures (such as comorbidities and drug exposure) relative to a reference group. Each RR table included event and non-event counts, risk estimates, RR with 95% confidence intervals, and p-values from χ² square or Fisher’s exact tests. Additionally, site-level baseline tables summarized mortality rates by site using a global χ² test, and site-specific RR tables compared outcomes across sites, with the largest site as the reference. Univariable and multivariable Poisson regression models with robust standard errors were used to estimate adjusted RRs for continuous, categorical, and binary predictors.

**Survival Analyses and Confounding Control**

The primary outcome was all‑cause mortality by 28 days; mortality by 180 days was secondary. We generated Kaplan–Meier curves by glycemic category and compared strata with log‑rank tests (descriptive). Multivariable Cox proportional hazards models estimated adjusted hazard ratios (aHRs) and 95% CIs across TWA glucose bins (reference: 100–139 mg/dL). Prespecified confounders included diabetes status, septic/cardiogenic shock and vasopressor score, day‑1 insulin, corticosteroids, vasopressors, cancer, clinical site, and glycemic monitoring intensity measures. We assessed proportional hazards using Schoenfeld residuals and time‑interaction probes; where violated, we used stratification or time‑varying terms. We report Harrell’s C‑index for Cox discrimination. Subgroup Cox analyses stratified by HbA1c categories (≤5.6%, 5.7–6.4%, 6.5–9.0%, >9.0%) .

**Severity Score Models**

For baseline comparison, logistic regression models using the Sequential Organ Failure Assessment (SOFA) score and the Acute Physiology and Chronic Health Evaluation II (APACHE II) score were fit to predict 28‑day survival. Scores were calculated using the worst physiologic values recorded within the first 24 hours of ICU admission. These models served as clinical benchmarks against which machine learning approaches were compared.

**Machine Learning and Ensemble Modeling**

All machine learning and deep learning models were trained using features derived from the first ICU day. Model development followed a standardized workflow including preprocessing, cross‑validation, probability calibration, and performance evaluation.

We evaluated gradient‑boosted decision trees (XGBoost), fully connected neural networks (FCNN), and a DeepSurv‑like neural Cox proportional hazards model. Hybrid and ensemble approaches were also examined, including stacked models that combined calibrated predictions from multiple base learners.

For comparison, a logistic regression models using the Sequential Organ Failure Assessment (SOFA) score and the Acute Physiology and Chronic Health Evaluation II (APACHE II) score were fit to predict 28-day survival, serving as baselines against which advanced machine learning approaches were compared.

All machine learning models (including an XGBoost classifier) and deep learning models were trained using first-day features. Model development included preprocessing, cross-validation, hyperparameter tuning, and calibration. Performance metrics included AUROC, accuracy, sensitivity, specificity, precision, recall, F1 score, and Brier score. SHAP values were used for interpretability comparisons included fully connected neural networks (FCNN), DeepSurv, and ensemble models. Beyond XGBoost, we compared multiple architectures: FCNN, an FCNN+XGBoost hybrid, DeepSurv, XGBoost+DeepSurv, and two ensemble models; ARItaSURV and GlucoSurvAI. The hybrid model incorporated calibrated XGBoost predictions as inputs to an FCNN, leveraging deep feature interactions on top of gradient-boosted trees.3-6

To complement these models, we incorporated a DeepSurv-like CoxPH model, a deep learning-based survival model that extends the Cox proportional hazards framework. DeepSurv is particularly well suited to capturing nonlinear effects and time-to-event relationships, making it valuable for modeling survival under varying glycemic conditions.7-10

The primary ensemble model, GlucoSurvAI, integrates a DeepSurv‑derived survival risk signal with calibrated predictions from XGBoost and an FCNN using a stacked logistic regression meta‑learner. This architecture allows simultaneous modeling of time‑to‑event dynamics and nonlinear feature interactions. The conceptual design of GlucoSurvAI is illustrated in eFigure 1.

**Model Evaluation**

Model performance for 28‑day survival prediction was assessed using 10‑fold stratified cross‑validation. Discrimination was summarized using the area under the receiver operating characteristic curve (AUROC), and calibration was evaluated using the Brier score. Sensitivity (recall) was computed as TP / (TP + FN), representing the proportion of true positives correctly identified, while specificity was TN / (TN + FP), indicating the proportion of true negatives correctly classified. Precision was defined as TP / (TP + FP), and the F1 score was the harmonic mean of precision and recall. Calibration was evaluated using the Brier score, which measures the mean squared difference between predicted probabilities and actual outcomes. Confusion matrices were generated at the optimal threshold to derive sensitivity, specificity, and Youden’s J. Additionally, threshold tuning was performed across a range of cutoffs (0.0–1.0) to visualize trade-offs between sensitivity, specificity, precision, and F1 score, aiding in the selection of the most clinically relevant threshold. For survival models, Harrell’s concordance index (C‑index) was also reported.

To derive binary predictions, decision thresholds were selected using Youden’s J statistic on training folds and held fixed during evaluation to reduce optimism bias. Clinical site was excluded from baseline model comparisons to assess physiologic signal alone but included in adjusted models to account for site‑level heterogeneity.

**SOFA — Logistic Regression**

We analyzed 28-day survival using a standardized preprocessing workflow. The source dataset (imputed1.csv) was read and copied; we removed identifiers, date/time variables, and potential label leakage fields (such as additional survival labels and “days since admission”) while retaining clinically relevant covariates. Categorical variables were label‑encoded. After exclusions, we explicitly ensured the SOFA score remained in the predictor set and defined the binary outcome as survival_28d. We trained a scikit‑learn logistic regression classifier (max_iter = 1000) using an 80/20 train–test split and evaluated accuracy, AUROC, the confusion matrix, and the classification report. Threshold optimization was performed on the training data by sweeping decision thresholds and maximizing Youden’s J (sensitivity + specificity – 1) and the F1 score; the resulting classification threshold was estimated during model development and held fixed during performance evaluation to avoid optimism bias. The optimal Youden J threshold (≈0.83) was then applied within the 10‑fold stratified cross‑validation framework to compute AUROC, sensitivity, specificity, accuracy, and Brier score and to generate per‑fold calibration curves. To isolate the contribution of SOFA alone, we retrained with only the SOFA feature, inspected ROC coordinates, applied isotonic calibration, and recalibrated the decision threshold (≈ 0.92) to balance sensitivity and specificity.

**APACHE II — Logistic Regression**

The APACHE II pipeline mirrored the SOFA workflow, with the same exclusions and imputations and explicit retention of APACHE II in the predictor set. We trained Logistic Regression(max_iter=1000) on an 80/20 split and optimized operating points with Youden’s J (≈ 0.93), followed by 10‑fold stratified cross-validation that included calibration curves and Brier scores. To improve probability reliability, we applied isotonic calibration (Calibrated ClassifierCV(method='isotonic')) to the pre-fitted logistic model, re‑derived the operating threshold using ROC based Youden’s J (≈ 0.934) and re-evaluated per fold metrics. This procedure ensured better alignment of predicted probabilities with observed event frequencies while maintaining‑ interpretability of the APACHE II based linear decision boundary.

**XGBoost (GradientBoosted‑ Trees for 28-‑Day Survival)**

For XGBoost classification, we prepared features by dropping identifiers, date/time variables, and high impact/target related fields (including SOFA and APACHE II) to avoid leakage while preserving clinical covariates; categorical variables were label encoded. We trained XGBClassifier (logloss) and first assessed performance on a hold‑out split; we then ran 10‑fold cross-validation using tuned hyperparameters (such as n_estimators=200, max_depth=6, learning_rate=0.05, subsample=0.8, col sample_bytree=0.8). For each fold, we computed the Youden-optimal threshold and reported AUROC, sensitivity, specificity, accuracy, and Brier scores. To interpret model behavior, we generated feature importance plots (gain) and SHAP summary plots, including analyses stratified by glucose category (euglycemic and hyperglycemic; hypoglycemic was too small for modeling). For probability calibration, we aggregated out‑of-fold predicted probabilities, plotted a mean calibration curve, applied isotonic regression to calibrate scores, and performed global threshold sweeps to identify operating points maximizing F1 (≈ 0.34) versus Youden (≈ 0.92). We then plotted the final AUROC curve and reported summary metrics for the calibrated model.

**DeepSurv (Neural Cox Model for Time-to-Event)**

We implemented a DeepSurv-like architecture using pycox and torchtuples. After exclusions and one-hot encoding of categorical variables, we defined survival time as days_since_admission_28d and the event indicator as 1 − survival_28d (death = 1). Predictors were standardized with Standard Scaler. The neural network was a multilayer perceptron with two hidden layers (128 and 64 units) and dropout (0.1), producing a single linear output interpreted as a Cox log risk; training used the CoxPH partial log‑likelihood with the Adam optimizer for 100 epochs, followed by computation of baseline hazards and prediction of patient-level survival curves (predict_surv_df). We evaluated survival ranking with the time-dependent concordance index. To obtain a binary proxy for 28-day death from the survival model, we set a threshold and predicted risk scores (using median and F1‑optimized thresholds in the ~2.1–2.47 range), then reported AUROC, confusion matrices, precision, recall, F1, specificity, sensitivity, Brier scores, and calibration plots (observed death rates binned against predicted risk). We repeated this procedure in 10‑fold cross‑validation, retraining the network per fold and evaluating risk-based classification performance at the chosen threshold.

**DeepSurv + XGBoost (Planned Fusion)**

Although the current analyses trained DeepSurv and XGBoost independently, we plan to evaluate a fused approach in two complementary ways. In a stacking configuration, the DeepSurv derived risk score (or the 28-day survival probability from the predicted curve) will be appended to the tabular feature set as an additional predictor for XGBoost; after training, probabilities will be calibrated by isotonic regression and thresholds selected using F1 or Youden criteria. In a late fusion configuration, the calibrated XGBoost probability and the calibrated DeepSurv derived 28‑day death probability (such as 1 − S(28)) was combined via weighted averaging or logit stacking learned on a validation set; the fused probability was then set at a threshold to meet a clinically meaningful operating point (such as sensitivity ≥ 0.85). In both cases, we applied the same cross-validated evaluation and calibration procedures, reporting AUROC/PR curves, calibration plots, Brier scores, and decision thresholds aligned to target clinical sensitivity/specificity.

**Fully connected neural network (FCNN)**

We trained a fully connected neural network on standardized and one-hot encoded features, excluding high impact/target-like variables (such as survival labels, identifiers, and acuity scores) to prevent leakage. The architecture comprised three hidden layers with 128, 64, and 32 units, ReLU activations, batch normalization after the first hidden layer, dropout of 0.30 on the first two hidden layers, and a sigmoid output for binary mortality prediction. Models were optimized with Adam (learning rate 0.001), binary cross‑entropy loss, 50 epochs, and batch size 32. Performance was estimated via 10‑fold stratified cross‑validation. For classification, the decision threshold was selected per fold using Youden’s J statistic from the ROC curve. Probabilistic calibration was assessed with calibration curves (sklearn.calibration.calibration_curve), and in a separate step we applied logistic regression (Platt scaling) to the FCNN scores to visualize calibration and report Brier scores. Across folds, the FCNN achieved mean AUROC 0.85 ± 0.03 and mean Brier score 0.0576 ± 0.0056.

**Gradient boosting + FCNN (two-stage)**

In the two-stage pipeline, we first fit an XGBoost classifier (eval_metric = logloss) on the original tabular features, then performed Platt scaling by fitting a logistic regression on the XGBoost raw probabilities against the fold’s held‑out labels. The calibrated XGBoost probability for each held-out case was appended as an additional numeric feature to the second stage FCNN (same architecture and training protocol as above). We repeated this procedure within a 10‑fold stratified cross‑validation, selecting the FCNN decision threshold with Youden’s J per fold. We generated calibration curves for the second stage FCNN probabilities and reported Brier scores. This two-stage model yielded mean AUROC 0.8655 ± 0.0310 and mean Brier score 0.0500 ± 0.0027 across folds.

**Stacked ensemble (ARitASurv: XGB + FCNN + Logistic Regression model)**

We constructed a stacked ensemble by training XGBoost (with Platt scaling) and the FCNN as base learners, then feeding their out-of-fold predicted probabilities into a logistic regression model. To derive operating characteristics consistent with early risk stratification, we tuned the model’s decision threshold globally via a sweep (0.00–1.00) using Youden’s J, selecting 0.95 as the optimal threshold; this threshold was fixed for all evaluations to avoid optimism bias. We evaluated the ensemble in 10‑fold stratified cross-validation, producing calibration curves for the model probabilities, and reporting Brier scores. The stacked ensemble achieved mean AUROC 0.8822 ± 0.0254 and mean Brier score 0.0495 ± 0.0049, with sensitivity/specificity trade‑offs summarized at the 0.95 operating point.

# **GlucoSurvAI — Overview and Design**

GlucoSurvAI is a stacked ensemble built to predict 28-day survival in critically ill patients by integrating three components: a DeepSurv‑like neural Cox model (for time‑to-event risk estimation), an XGBoost classifier (for nonlinear tabular prediction), and a fully connected neural network (FCNN), whose outputs were combined through a logistic regression model after probability calibration. Our workflow implemented systematic preprocessing, cross-validated training, probability calibration (isotonic or Platt), threshold optimization using Youden’s J and F1, and comprehensive performance reporting (AUROC, accuracy, sensitivity, specificity, precision, recall, F1, Brier) alongside ROC and calibration curves. Our approach also emphasizes interpretability through SHAP analyses and stratified summaries by glucose bins, insulin status, and diabetes, with Kaplan–Meier curves used to visualize survival differences across glucose strata.

***Data Preparation and Feature Engineering***

We used imputed1.csv as the source dataset (≈106 columns with clinical, laboratory, medication, and timestamp fields). To reduce leakage and improve generalizability, we excluded identifiers, timestamps, and high impact target related variables (such as additional survival labels, “days since admission” targets, and clinical composite scores such as SOFA/APACHE II for certain training stages). Categorical variables were one‑hot encoded (pd.get_dummies(drop_first=True)), and the feature matrix was standardized via StandardScaler for deep models. For classification components, the binary outcome was survival_28d. For survival modeling, we defined time as days_since_admission_28d and the event indicator as E = 1 − survival_28d (death = 1). All models were trained using an 80/20 train–test split and evaluated with 10fold stratified CV, with fold-wise ROC and calibration curves saved for auditability.

***DeepSurv-like‑ Component (CoxPH Neural Network)***

The survival component uses pycox with a CoxPH objective and a torchtuples MLPVanilla network comprising two hidden layers (128 and 64 units) with dropout (0.1) and a single linear output interpreted as log-risk. Training employed Adam optimization for 100 epochs with batch size 256, producing steadily declining partial‑likelihood loss (such as ~5.24 to ~3.27 across runs). After training, we computed baseline hazards and predicted patient‑level survival curves (predict_surv_df). We then extracted risk scores for all patients and used them as inputs to the stacked classification workflow. Survival ranking was assessed by time-dependent concordance, and the model outputs supported downstream thresholding and calibration steps.

***XGBoost + FCNN Base Learners and Probability Calibration***

For nonlinear tabular learning, we trained XGBClassifier (log-loss) with tuned tree parameters (typical examples include n_estimators=200–300, max_depth=4–6, learning_rate=0.05, subsample=0.8, colsample_bytree=0.8), then calibrated raw probabilities using either logistic regression (Platt scaling) or isotonic regression (out ‑of ‑bounds clipping). The FCNN base learner consumed standardized features augmented by the calibrated XGB probability and the DeepSurv risk score; its architecture used 3 hidden layers (128→64→32) with dropout 0.3 and sigmoid output trained with binary cross-‑entropy (commonly 50 epochs, batch size 32). This produced well calibrated base predictors that capture global risk (DeepSurv), local nonlinearities (XGB), and higher order interactions (FCNN).

***Stacking and Model Training***

We implemented 10‑fold StratifiedKFold stacking. In each fold, we trained the base learners (XGB with calibration, FCNN, and DeepSurv risk) and formed the stacked feature vector [xgb_calibrated_prob, fcnn_prob, deep_risk_score]. A logistic regression model was then trained on these stacked features to produce final probabilities. Across experiments, the model achieved overall AUROC in the 0.96–0.98 range (such as model AUC ≈ 0.967–0.981 in representative runs), with corresponding cross-validated operating metrics reported below. ROC coordinates were saved per fold and overall, enabling reproducible comparison across candidate ensembles.

***Threshold Optimization and Probability Calibration***

Operating points were selected by Youden’s J statistic and, in sensitivity focused scenarios, by F1 maximization, with typical Youden’s J optimal thresholds around 0.91–0.95 depending on the fold and calibration choice (such as global best threshold ~0.92 with J≈0.81, later evaluated at 0.93; alternative fold‑specific optima such as 0.904). Model probabilities were calibrated via isotonic regression to ensure agreement between predicted and observed event frequencies, with calibration curves plotted fold‑wise and on aggregated out-of-fold predictions. Confusion matrices were reported at the chosen thresholds, and Brier scores summarized calibration quality (see metrics below).

***Cross-Validated Performance (Representative Results)***

Under 10‑fold CV at a calibrated global threshold (such as 0.93), the model achieved AUROC ≈ 0.967 ± 0.008, Accuracy ≈ 0.900 ± 0.006, Sensitivity ≈ 0.899 ± 0.006, Specificity ≈ 0.907 ± 0.021, Precision ≈ 0.992 ± 0.002, F1 ≈ 0.943 ± 0.004, and Brier ≈ 0.026 ± 0.004; confusion matrices at fixed thresholds (such as [[538,55],[750,6705]]) illustrate the class imbalance‑ context. In enhanced stacking runs, CV performance rose further—for example, AUROC ≈ 0.981 ± 0.006, Accuracy ≈ 0.935 ± 0.008, Sensitivity ≈ 0.936 ± 0.009, Specificity ≈ 0.926 ± 0.030, Precision ≈ 0.994 ± 0.003, F1 ≈ 0.964 ± 0.005, Brier ≈ 0.020 ± 0.003, with a typical confusion matrix such as [[549,44],[481,6974]] at threshold ≈ 0.91. Best folds (such as Fold 6 or Fold 9) showed AUROC ≳ 0.973–0.982 and Brier as low as ≈ 0.020, confirming strong discrimination and calibration once probabilities were isotonic ‑adjusted.

***Interpretability (SHAP) and Stratified Analyses***

To interpret model behavior, we applied SHAP on calibrated XGBoost (and model ‑features) and generated bubble/dot and bar plots by glucose bins (<100, 100–139, 140–179, ≥180 mg/dL), diabetes status, and glucose/insulin/corticosteroid use, focusing only on subgroups with sufficient sample size (≥10). Across runs, mean SHAP contributions for time_weighted_glucose varied by bin (such as <100 and 100–139 often showed stronger positive impacts than ≥180), and triple stratification highlighted large subgroups such as euglycemic/no-insulin/nondiabetic (n≈4357) and euglycemic/no-insulin/diabetic (n≈1387). We summarized subgroup survival rates and visualized Kaplan–Meier curves by glucose bin (and by bin × diabetes), observing monotonic declines in survival with higher glucose, with diabetics sometimes exhibiting relatively higher‑ survival at elevated glucose levels. These analyses complement the ensemble’s predictive performance by revealing clinically meaningful structure in the data.

***Model Comparison and ROC Aggregation***

We computed ROC curves for all candidate models: APACHE II, SOFA, XGBoost, DeepSurv, DeepSurv + XGBoost, FCNN, XGBoost + FCNN, ARitASurv, and GlucoSurvAI; capturing FPR/TPR coordinates, point counts, and AUCs, and plotted a comparative ROC figure with a “random guess” baseline. The updated analysis shows GlucoSurvAI achieving the highest AUC (≈0.967 ± 0.008) among all models, followed by ARitASurv (≈0.882) and XGBoost (≈0.894), while traditional scores like SOFA and APACHE II remain substantially lower (≈0.71 and ≈0.74, respectively). Ensembles consistently outperformed single learners, confirming the incremental value of stacking calibrated probabilities from XGBoost and FCNN with DeepSurv’s risk signal and Cox partial hazards.

***Reproducibility Notes***

We used StratifiedKFold (10 folds) for classification ensembles and re‑trained all base learners per fold; for survival, we employed CoxPH training with fixed architecture and epoch counts, saving baseline hazards and survival predictions. Probability calibration used isotonic regression with clipping, and thresholds were chosen via Youden’s J or F1 sweeps, then fixed for cross-fold reporting. We documented convergence warnings (such as LR lbfgs max‑iter) and SHAP shape mismatches when input feature sets were inconsistent, addressing them by increasing max_iter, standardizing inputs, and aligning feature matrices. Figures (mean calibration curves, SHAP plots, ROC comparisons) were saved with explicit filenames for audit.

***Cox Augmented‑ Stacking (New Input to the Model)***

In addition to the calibrated XGBoost probabilities, FCNN probabilities, and DeepSurv risk scores used previously, we added a fourth feature to GlucoSurvAI: a fold‑specific Cox partial hazard predicted from a penalized multivariable Cox model fit on the training partition and applied to the test partition. This Cox risk vector is aligned per fold and concatenated to form the stacked feature set [xgb_prob_cal, fcnn_prob, deep_risk, cox_partial_hazard] before training the logistic regression model and performing isotonic calibration of its output. This addition increases signal diversity by providing an adjusted, semi-parametric risk that complements the neural (DeepSurv) and tree‑based learners.

***Adjusted Cox Design with Glucose Bins (New Covariate Handling)***

We introduced an explicit adjusted design matrix for Cox, comprising clinical confounders (diabetes flags, day 1 insulin, glucose, corticosteroid & vasopressor administration, sepsis/shock indicators, cancer status, time‑weighted glucose) and a categorical glucose_bin derived from <100, 100–139, 140–179, ≥180 mg/dL (one-hot coding with 100-139 mg/dL reference). Unlike the prior pipeline where the Cox component was absent, GlucoSurvAI was fit with a Cox model within each CV fold and partial hazards were projected to the test set. We also fit a final Cox model on the full cohort to report adjusted hazard ratios (aHRs) per glucose bin and compute pairwise bin contrasts using coefficient differences and the fitted variance–covariance matrix outputs that did not exist in the earlier stack.

***Probability Calibration & Thresholding (Model ‑Output Unchanged, Inputs Expanded)***

The calibration protocol remains the same (isotonic regression applied to the model’s probabilities), as do operating point selections (Youden’s J and default 0.5), but the calibrated model probabilities would be informed by Cox partial hazards. In practice, this yielded similarly high AUCs (final calibrated AUC ~0.979) and low Brier scores (~0.021), with fold‑level metrics often improving or staying robust at Youden’s J optimized thresholds in the 0.93–0.98 range. The key change was where performance gains originate, from the added Cox-adjusted signal which can sharpen discrimination under certain confounding structures.

***Survival Discrimination Reporting (New C-Inde Tracking for Cox)***

In addition to the DeepSurv loss trajectory and risk outputs, GlucoSurvAI tracks Harrell’s concordance C-index (C-index) for the Cox models per fold (typical mean ~0.77–0.79 across folds in the integrated pipeline; earlier work had no C-index. This supplies an orthogonal survival ranking metric that helps validate the consistency between Cox‑derived risks and model classification outcomes.

***Clinically Interpretable Outputs (New aHR Tables & Forest Plots)***

Beyond ROC and calibration curves, we could generate adjusted hazard ratio tables (aHR with 95% CI and p-values) for glucose bins such as <100 mg/dL,140–179 mg/dL, 180+ mg/dL and pairwise contrasts between bins. These are visualized via log‑scale forest plots and were not present in the earlier ensemble. The aHRs complement SHAP style importance by offering adjusted, model‑based effect sizes suitable for clinical narrative.

***HbA1c Integration & Stratified Cox Analyses (New Subgroup Methodology)***

We added a categorical HbA1c variable (baseline normal) with deterministic resolution of multiple flags (diabetes > prediabetes > normal; plus not_measured), then estimated aHRs vs normal within each glucose bin and across demographic strata (age bins, race, ethnicity) and ICU reason strata (neurologic, organ failure, trauma, brain injury, psychologic, post-surgery, viral disease, sepsis), optionally adjusting for comorbidities. To ensure stable fits, we implemented convergence guards (near zero variance removal, sparse binary filtering, collinearity pruning, stronger ridge penalization) and exported CSV tables & forest plots. These Cox-based subgroup outputs were new in GlucoSurvAI and provided clinically interpretable stratified effects that the prior pipeline could not produce.

***Reproducibility & QA Enhancements (Cox‑Specific Guards)***

While we retained StratifiedKFold (10 folds) and aligned train/test feature sets as before, we added GlucoSurvAI Cox-specific quality controls: reindexing test designs to match train columns, cleaning inf/NaN, dropping low‑variance/separating covariates, and refitting reduced designs if convergence fails (such as confounders ‑only model). We then logged C-index alongside AUC/Brier score and saved aHR tables/plots for supplemental materials.

***Site‑Aware Training Stack (New meta‑features tracked & per‑site evaluation)***

In the site analyses, GlucoSurvAI retained the stacked learners (XGBoost, FCNN, optional DeepSurv) and the penalized CoxPH partial hazards as a fourth meta‑feature, but training explicitly tracked per‑fold C‑indices and aggregates calibrated meta‑probabilities with site labels to enable per‑site evaluation. After stacking and isotonic calibration, the final AUC (AUROC) and Brier were still reported globally (such as AUC≈0.977; Brier≈0.023), yet importantly, the same calibrated probabilities are stratified by site to compute AUC, sensitivity, specificity, PPV, and NPV at fixed 0.5 and Youden’s J thresholds. This adjustment extended prior global only reporting by adding a site‑aware performance layer (such as best site AUC≈0.988 at Site_13; sites with sparse sample or single‑class imbalance are skipped with notes and minimums of ≥20 rows and ≥3 events/non‑events).

***Site‑Stratified Cox (New stratification by care site for adjusted hazards)***

Beyond using CoxPH as a model feature in GlucoSurvAI, we fit a global Cox model stratified by site to produce adjusted hazard ratios for glucose bins and clinical confounders, while allowing site‑specific baseline hazards. This adjustment delivered site-robust estimates of bin effects (such as 100–139 mg/dL tending to HR<1 and 140–179 mg/dL to HR>1 in the stratified fit) and expands interpretability in a way the earlier stack did not provide. In addition, per‑site Cox tables were created, isolating glucose‑bin terms within each site and exporting both CSVs and forest plots. Sites that fail minimums or convergence (such as separation or NaNs in Site_3 and Site_4) are logged with explicit reasons in the notes, improving transparency of fit stability at the site level.

***Confounder Adjustment Design (Refined, site‑aware & bin‑aware)***

Adjusted design matrices were used to incorporate a robust set of clinical confounders for Cox and site analyses: diabetes flag, septic or cardiogenic shock, day 1 insulin, glucose, corticosteroid, and vasopressor indicators, cancer status, and time weighted glucose These confounders are aligned per fold for Cox & GlucoSurvAI features and reused in the site-level Cox, making confounding control operational at the site stratum rather than only in global models. To address site‑specific convergence risks from sparse therapies or near constant indicators, the pipeline implements Cox-specific QA: dropping near zero variance and sparse binary features, pruning highly collinear variables (|ρ|>0.995), applying ridge penalization (penalizer 0.2–0.5) with robust variance, and enforcing post clean minimums (≥20 rows and ≥3 events) before the fit proceeds. These guards are applied inside each site/stratum and documented when they trigger, which is a substantive expansion over the earlier, primarily global setup.

**eResults**

**Baseline Measurements and Site Heterogeneity in Monitoring and Treatment Signals**

Concerning continuous measures (Alive vs. Died by 28 days), non‑survivors had higher time‑weighted glucose (TWAG) during day 1 (median 141.18 ± 43.68 vs. 121.87 ± 34.64 mg/dL; Mann–Whitney U, p<0.001), lower time‑weighted systolic and diastolic blood pressure higher respiratory rate and lower arterial oxygen saturation (Mann–Whitney U, p<0.001). Glycemic time fractions differed: TBR_day1 was lower and TAR_day1 higher among non‑survivors (Mann–Whitney U, both p<0.001). Higher SOFA and APACHE II scores, and greater age were significantly observed in the non‑survivor group (p<0.001). Laboratory profiles showed higher urea nitrogen, anion gap, white blood cell count, and lower hemoglobin/hematocrit among non‑survivors (all Mann–Whitney U, p<0.001); (eTable 2A).

Among 8,048 ICU patients, survival differed significantly by race and glycemic status. European American patients had higher odds of survival compared to others (OR = 1.378, 95% CI: 1.152–1.649), while patients classified as Other/Unknown race had lower odds (OR = 0.589, 95% CI: 0.464–0.747). Gender and ethnicity were not significantly associated with survival. Glycemic category showed strong associations: euglycemic patients had more than twice the odds of survival (OR = 2.182, 95% CI: 1.736–2.744), whereas hyperglycemia was linked to reduced survival (OR = 0.462, 95% CI: 0.367–0.582,). Hypoglycemia was rare and not statistically significant. Day 1 interventions were also predictive: insulin use (OR = 0.471, 95% CI: 0.374–0.592), vasopressor administration (OR = 0.260, 95% CI: 0.213–0.317), and corticosteroid exposure (OR = 0.071, 95% CI: 0.042–0.119) were all associated with markedly lower survival odds. Glucose-modifying drug use was not significant (eTable 2B).

Mortality varied markedly by site (global Chi‑square, p<0.001). Relative to Site 4 (mortality 3.67%), Site 13 exhibited higher mortality (48.68%; RR 13.26, 95%CI: 10.98–16.01), and Site 3 also had elevated risk (RR 3.12, 95%CI: 2.54–3.84); some smaller sites showed non‑significant differences due to limited counts [eTable 2C & D].

The higher mortality observed in Site 13 and Site 3 appears to be linked to greater disease burden, as reflected by both SOFA and APACHE II severity profiles and their 28‑day mortality relative risks (RRs). For SOFA, Site 13 showed a stepwise increase in risk versus Low: Moderate RR = 2.78 (95% CI: 1.71-4.51), Severe RR = 3.37 (95% CI:2.07-5.47), and Terminal RR = 5.05 (95%CI: 3.20, 7.97); Site 3 demonstrated a similar gradient: Moderate RR = 1.68 (95%CI: 0.98-2.88), Severe RR = 2.42 (95%CI: 1.41-4.14), and Terminal RR = 6.78 (95%CI: 4.01-11.45). Consistent patterns were seen with APACHE II: Site 13 had Moderate RR = 2.50 (95%CI: 1.86-3.35) and Severe RR = 2.98 (95%CI: 2.20, 4.05), Terminal RR = 1.94 with a wide 95%CI (0.47-7.95); Site 3 showed Moderate RR = 2.81 (1.99, 3.98) and Severe RR = 6.21 (4.07, 9.48). Other sites also exhibited elevated risk at higher severity levels; for example, Site 4 had SOFA Terminal RR = 9.52 (95%CI: 5.96-15.22) and APACHE II Moderate RR = 3.23 (95%CI: 2.37, 4.40), and Site 2 showed SOFA Terminal RR = 14.54 (95%CI: 5.18, 40.87) with an extreme APACHE II Severe RR = 27.43 (95%CI: 20.53-36.66) driven by sparse cells, suggesting caution in strata with small counts or zero cells.

With regards to categorical measures and exposures, glycemic category on day 1 was associated with outcome as hyperglycemia vs. euglycemia showed a higher risk of death (RR 2.01, 95% CI: 1.64–2.46). Several admission indications/comorbidities were associated with death: septic or cardiogenic shock (RR 2.54, 2.18–2.96; p<0.001), sepsis (RR 2.03, 95%CI: 1.73–2.39), acute kidney injury (RR 1.24, 95%CI:1.07–1.45), and brain injury (RR 1.81, 95%CI: 1.39–2.35) increased risk; whereas hypertension (RR 0.48, 95%CI: 0.41–0.56), COPD (RR 0.48, 95%CI: 0.36–0.65), injury/trauma (RR 0.58, 95%CI: 0.40–0.83), and psychologic indications (RR 0.41, 95%CI: 0.34–0.50) were associated with lower death risk. Race/ethnicity differences were observed: Other/Unknown vs. White (RR 1.69, 95%CI: 1.36–2.10) and Hispanic vs. Not Hispanic (RR 1.33, 95%CI:1.02–1.73) had higher death risk (eTable 2F).

**Treatment and baseline glycemia (HbA1c) effects**

Among HbA1c strata, poorly controlled diabetes (HbA1c >9.0%) was associated with lower hazards than normal HbA1c (28‑day aHR 0.58, 95% CI 0.41–0.83; 6‑month aHR 0.48, 95% CI 0.33–0.70), whereas prediabetes and moderate diabetes (6.5–9.0%) were not significant. Day‑1 insulin use was associated with higher mortality (28‑day aHR 2.33, 95% CI 1.62–3.34; 6‑month aHR 2.49, 95% CI 1.81–3.43), while first day glucose (for hypoglycemia) was protective (28‑day aHR 0.67, 95% CI 0.52–0.85; 6‑month aHR 0.66, 95% CI 0.53–0.83). Wald and likelihood‑ratio tests were consistent with these estimates.

## **GlucoSurvAI SHAP-Based Bin-Level Analysis of Time-Weighted Glucose and 28-Day Survival**

To refine survival prediction beyond traditional glycemic categories, we used GlucoSurvAI to perform SHAP-based bin-level analysis of time-weighted glucose values. Glucose measurements during the first 24 hours of ICU admission were stratified into 4 discrete bins, namely: <100 mg/dL (N=909), 100–139 mg/dL (N = 4781), 140–180 mg/dL (N = 1,627), and 180+ mg/dL (N = 731). SHAP values were computed for each bin to quantify the contribution of glucose exposure to predicted 28-day mortality and analysis was adjusted for confounders such as insulin, glucose, corticosteroid and vasopressor administration, diabetes status, shock (septic or cardiovascular) and cancer. The highest positive SHAP contributions were observed in the 100–139 mg/dL range (mean SHAP = 0.0288), followed by <100 mg/dL (0.0140), suggesting these ranges were most protective. In contrast, glucose bins above 140 mg/dL showed progressively lower SHAP values, with the 140–179 mg/dL bin yielding lower mean SHAP (0.0092) and 180+ mg/dL the lowest mean SHAP (0.0016), indicating increased mortality risk (Figure 3). These findings support a refined glycemic target window and demonstrate GlucoSurvAI’s capacity to capture nuanced, nonlinear relationships between glucose exposure and survival.

**Integration of Multivariable Cox Regression into GlucoSurvAI Highlights the Impact of Glycemic Exposure and Treatment on Mortality**

Because the mean SHAP values indicated an inflection point in survival at approximately 140 mg/dL, we performed additional statistical analyses to corroborate this observation. A multivariable Cox regression model was incorporated into the GlucoSurvAI framework (see Supplementary Methods), adjusting for diabetes status, insulin, glucose, and corticosteroid exposure; vasopressor use; clinical site; septic or cardiogenic shock; and cancer. The model demonstrated excellent performance and discrimination, with a mean AUROC of 0.979, mean Brier score of 0.021, and mean Harrell’s C-index of 0.773.

Several confounders demonstrated strong independent associations with mortality after full adjustment (eTable 4(B), eFigure 4). Septic or cardiogenic shock emerged as the most influential acute factor (aHR 1.58, 95% CI: 1.40–1.78). First day interventions were also significant: corticosteroid use was associated with the highest risk (aHR 2.99, 95% CI: 2.03–4.39), followed by vasopressor exposure (aHR 1.80, 95% CI: 1.53–2.11) and insulin administration (aHR 1.21, 95% CI: 1.02–1.45). Prediabetes by HbA1c modestly increased risk (aHR 1.22, 95% CI: 1.05–1.40), whereas diabetes (aHR 0.81, 95% CI: 0.73–0.91) and cancer (aHR 0.87, 95% CI: 0.77–0.98) were associated with decreased 28-day mortality. Continuous predictors were also important: time-weighted glucose was significant (both p < 0.001), and clinical site variability (aHR 1.11, 95% CI: 1.09–1.13) indicated institutional differences in outcomes.

**eFigures**

**eFigure 1. GlucoSurvAI Architecture**

Schematic representation of the GlucoSurvAI ensemble framework. The model integrates a DeepSurv-like survival network, XGBoost, and a fully connected neural network (FCNN) within a cross-validated stacking approach. A logistic regression layer combines outputs for optimized prediction

**eFigure 2. Significant non-confounders adjusted for confounders and glucose bin (reference = 100–139 mg/dL)**

Forest plot showing adjusted hazard ratios (aHR) and 95% confidence intervals for non-confounding variables retained in the multivariable Cox model after controlling for confounders and the reference glucose range. Significant predictors include acute conditions (brain injury, sepsis), hematologic and biochemical markers (INR, platelets, hemoglobin, bilirubin, anion gap, urea nitrogen, sodium deviation), physiologic measures (time-weighted systolic blood pressure), and chronic comorbidities (COPD, hypertension, organ failure, psychologic disorders, viral disease). The red dashed line represents the null value (HR = 1.0); points to the right indicate increased mortality risk, while points to the left indicate protective associations.


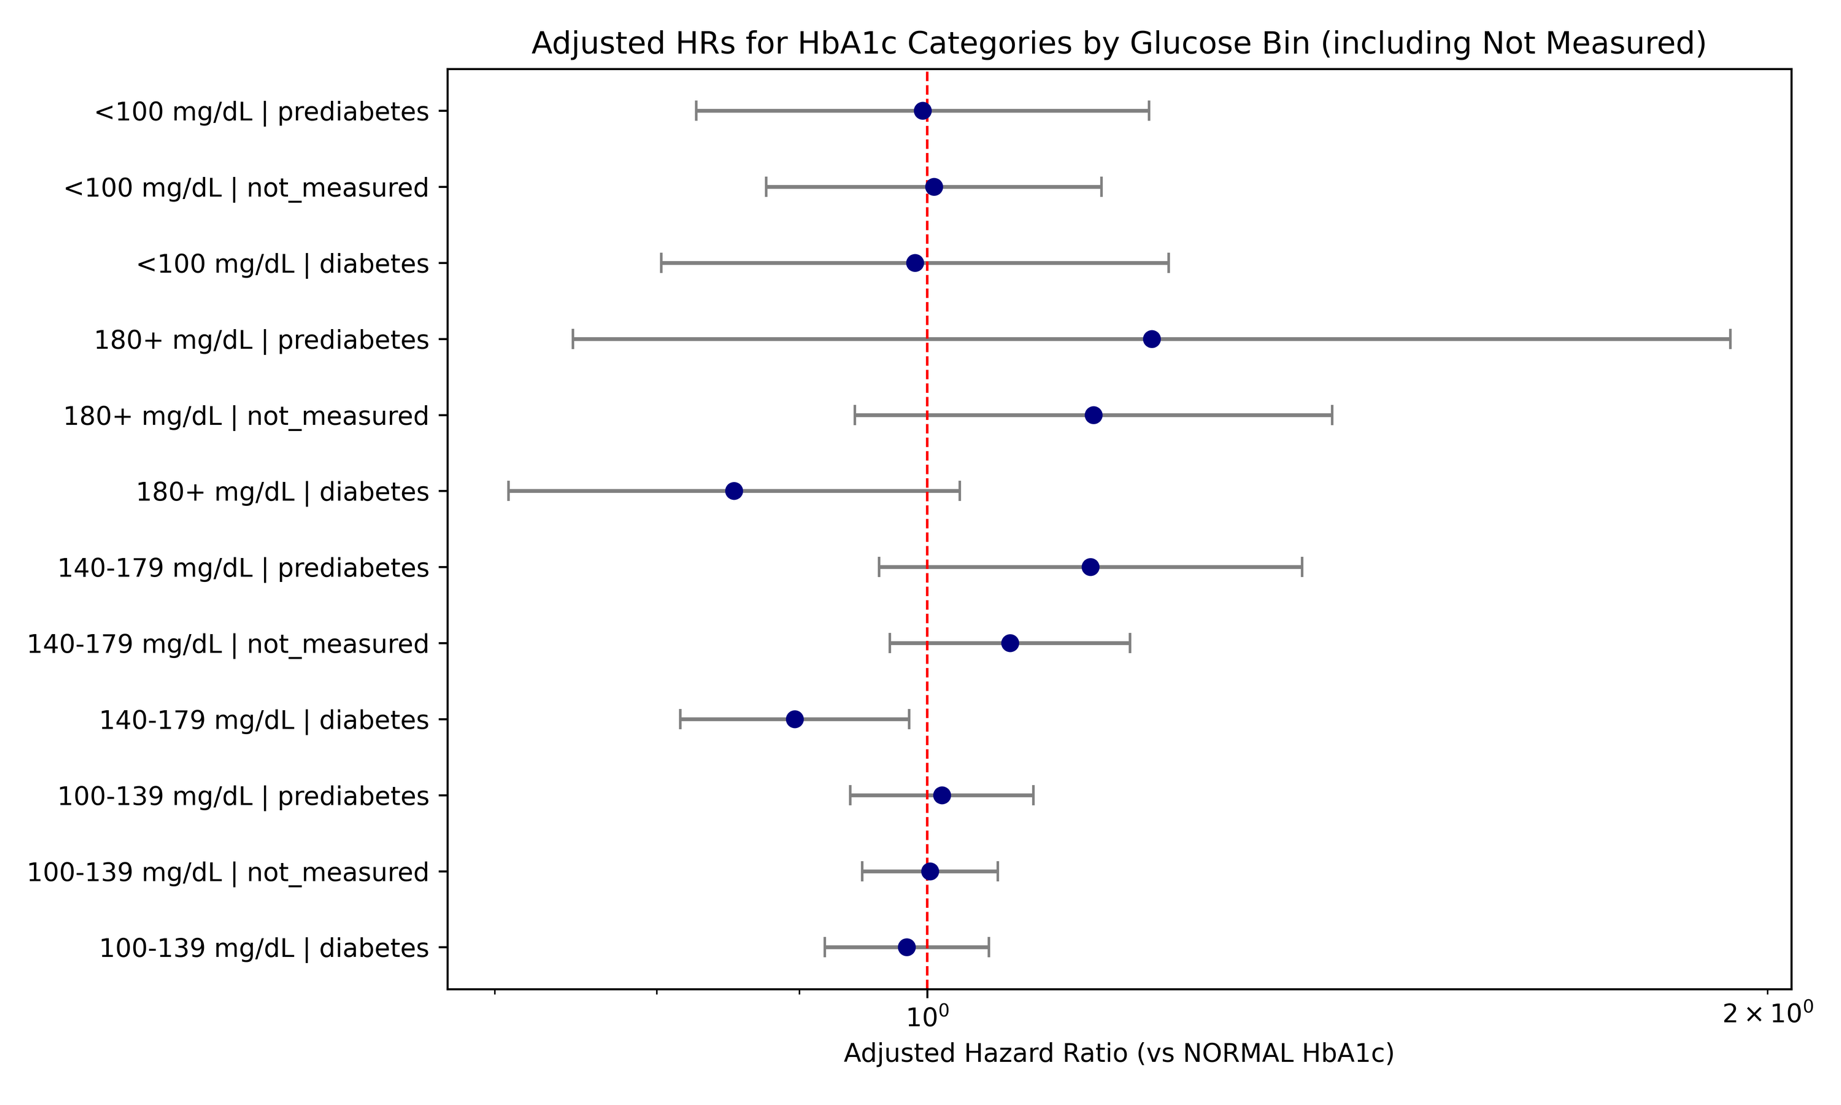
**eFigure 3. Adjusted hazard ratios for HbA1c categories stratified by end‑of‑day glucose bins (reference = Normal HbA1c)**

Forest plot displaying adjusted hazard ratios (aHR) and 95% confidence intervals for combinations of glucose bins (<100, 100–139, 140–179, ≥180 mg/dL) with HbA1c categories (prediabetes, diabetes, not measured). The red dashed line indicates HR = 1.0. In the ≥180 mg/dL bin, diabetes is associated with lower hazards, whereas prediabetes is associated with higher hazards; intermediate glucose levels (140–179 mg/dL) show a more modest elevation for prediabetes. Estimates for “not measured” display wider intervals, reflecting uncertainty due to missing HbA1c.

**eFigure 4. Significant confounders adjusted by glucose bin (reference = 100–139 mg/dL)**


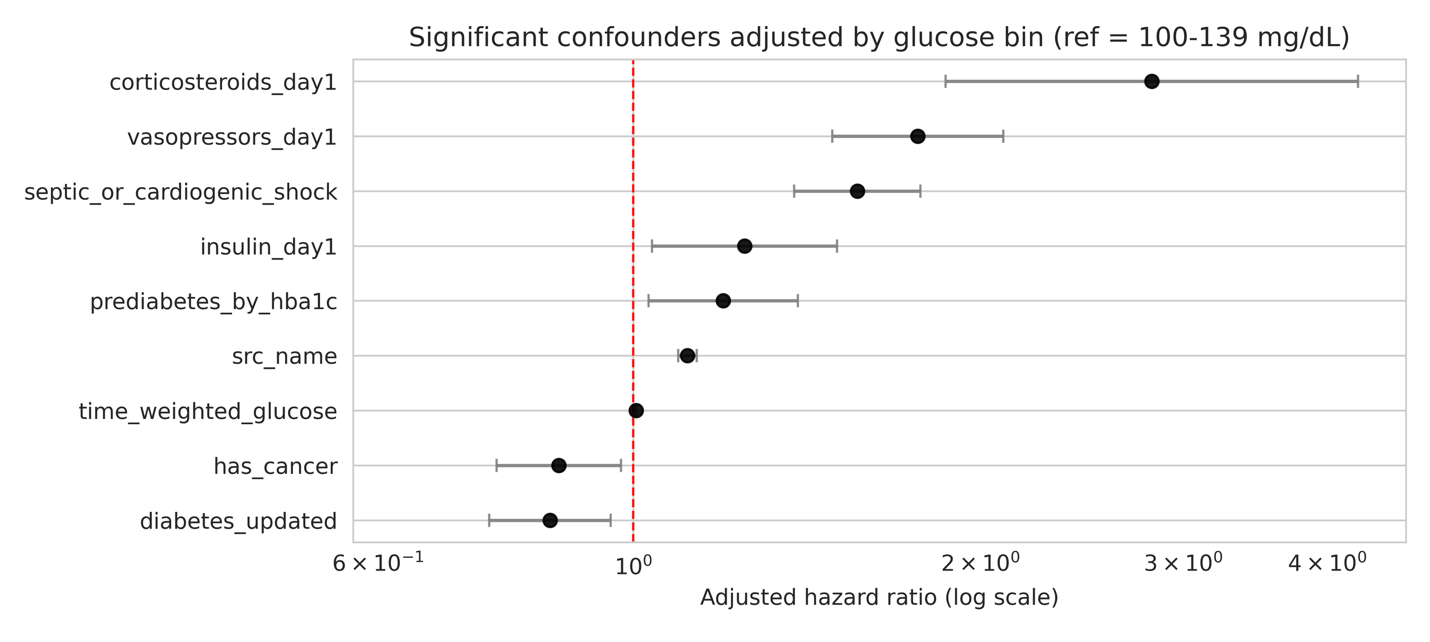


Forest plot showing adjusted hazard ratios (aHR) and 95% confidence intervals for confounders retained in the multivariable Cox model after controlling for the reference glucose range. Key predictors include acute severity markers (septic or cardiogenic shock, vasopressor exposure across ICU days, vasopressor score), pharmacologic interventions (corticosteroid use on day 2), glycemic-related factors (time-weighted glucose, day-specific averages), and chronic conditions (diabetes status, cancer). The red dashed line indicates the null value (HR = 1.0). Points to the right of the line represent increased mortality risk, while points to the left indicate protective associations.

**eReferences**

1. Shadbahr T, Roberts M, Stanczuk J, et al. The impact of imputation quality on machine learning classifiers for datasets with missing values. *Commun Med (Lond)*. Oct 6 2023;3(1):139. doi:10.1038/s43856-023-00356-z

2. van Buuren SO, K. . *Flexible Multivariate Imputation by MICE*. vol PG/VGZ/99.054. TNO Prevention and Health; 1999.

3. Karasneh R, Al-Azzam S, Alzoubi KH, et al. ICU Mortality Prediction Using XGBoost-based Scoring Systems: A Study from a Developing Country. *Rev Recent Clin Trials*. Jun 18 2025;doi:10.2174/0115748871348585250604065542

4. Kvamme HB, O..; Scheel, I. Time-to-Event Prediction with Neural Networks and Cox Regression. *Journal of Machine Learning Research*. 2019;20:1-30.

5. Xie H, Wang B, Hong Y. A deep learning approach for acute liver failure prediction with combined fully connected and convolutional neural networks. *Technol Health Care*. 2024;32(S1):555-564. doi:10.3233/THC-248048

6. Ghosh D, Pal S, Lutz M, Luo S, for Alzheimer's Disease Neuroimaging I. Ensemble survival analysis for preclinical cognitive decline prediction in Alzheimer's disease using longitudinal biomarkers. *J Alzheimers Dis*. Aug 14 2025:13872877251365621. doi:10.1177/13872877251365621

7. Su X, Sun L, Sun X, Zhao Q. Machine learning for predicting device-associated infection and 30-day survival outcomes after invasive device procedure in intensive care unit patients. *Sci Rep*. Oct 10 2024;14(1):23726. doi:10.1038/s41598-024-74585-0

8. Tang H, Jin Z, Deng J, et al. Development and validation of a deep learning model to predict the survival of patients in ICU. *J Am Med Inform Assoc*. Aug 16 2022;29(9):1567-1576. doi:10.1093/jamia/ocac098

9. Wang J, Kang Q, Tian S, Zhang S, Wang K, Feng G. Development, Validation, and Deployment of a Time-Dependent Machine Learning Model for Predicting One-Year Mortality Risk in Critically Ill Patients with Heart Failure. *Bioengineering (Basel)*. May 12 2025;12(5)doi:10.3390/bioengineering12050511

10. Yan F, Chen X, Quan X, Wang L, Wei X, Zhu J. Association between the stress hyperglycemia ratio and 28-day all-cause mortality in critically ill patients with sepsis: a retrospective cohort study and predictive model establishment based on machine learning. *Cardiovasc Diabetol*. May 9 2024;23(1):163. doi:10.1186/s12933-024-02265-4
