# Supplementary material for: First-Day Glycemic Exposure and 28-Day Mortality in the ICU: A Multicohort Study
Source: Research Square preprint supplement (doi:10.21203/rs.3.rs-9710742/v1), 2026-06-11
Supplement: Supplementary file 2 [file c2ff951f021c02e9ce3ecd3c.xlsx]

## Sheet: eTable 1
eTable 1. Distribution of first-day blood glucose and initial glycemic management among ICU patients.
A) Glycemic categories based on the first recorded glucose measurement
	n	pct
Euglycemic (70–180 mg/dL)	6511	82.47
Hyperglycemic (>180 mg/dL)	1291	16.35
Hypoglycemic (<70 mg/dL)	93	1.18
B) Occurrence of hypo or hyperglycemia during the first ICU day
n_ever_hypo_day	n_ever_hyper_day	n_stayed_70_180_day
185	2056	7068
A) summarizes glycemic categories based on the first recorded glucose measurement: euglycemic (70–180 mg/dL), hyperglycemic (>180 mg/dL), and hypoglycemic (<70 mg/dL). B) shows the number of patients who experienced hypoglycemia or hyperglycemia at any point during the first ICU day, and those who remained within the 70–180 mg/dL range throughout. Of note, 158 of the 8,048 patients lacked complet…

## Sheet: eTable 2
eTable 2. Baseline Characteristics and Site-Level Mortality Patterns
A. Baseline clinical and physiologic characteristics by 28‑day survival status
Variable	Alive at 28 days_Median	Alive at 28 days_IQR	Alive at 28 days_N	Died by 28 days_Median	Died by 28 days_IQR	Died by 28 days_N	ShapiroW_Alive_p	ShapiroW_Died_p	Distribution	MannWhitneyU_P	Total_Percent_NonMissing
time_weighted_glucose	121.87	34.64	7455	141.18	43.68	593	0	0	Skewed (MWU reported)	0	100
hospital_los_hours	191.1	272.1	7455	198	233.4	593	0	0	Skewed (MWU reported)	0.210429	100
n_glucose_points	50	75	7455	85	105	593	0	0	Skewed (MWU reported)	0	100
worst_body_temperature	37.2	0	7455	37.2	0	593	0	0	Skewed (MWU reported)	0.000158	100
twa_diastolic_bp	67.2	13.01	7455	63.15	14.06	593	0	1e-06	Skewed (MWU reported)	0	100
coverage_hours_diastolic_bp	23.36	0.73	7455	23.73	0.65	593	0	0	Skewed (MWU reported)	0	100
prop_covered_24h_diastolic_bp	0.97	0.03	7455	0.99	0.03	593	0	0	Skewed (MWU reported)	0	100
worst_oxygen_saturation__arterial_	95	5	7455	93	9.7	593	0	0	Skewed (MWU reported)	0	100
worst_respiratory_rate	20	6	7455	24	11	593	0	0	Skewed (MWU reported)	0	100
twa_systolic_bp	125.64	25.12	7455	115.77	24.75	593	0	5e-06	Skewed (MWU reported)	0	100
coverage_hours_systolic_bp	23.36	0.73	7455	23.73	0.65	593	0	0	Skewed (MWU reported)	0	100
prop_covered_24h_systolic_bp	0.97	0.03	7455	0.99	0.03	593	0	0	Skewed (MWU reported)	0	100
last_weight	2576	1328	7455	2363.33	2977.89	593	0	0	Skewed (MWU reported)	2e-06	100
last_height	68.27	8	7455	70	95	593	0	0	Skewed (MWU reported)	3.8e-05	100
worst_dev_C02__mol_vol_	3	3	7455	4	5	593	0	0	Skewed (MWU reported)	0	100
worst_value_C02__mol_vol_	22	6	7455	21	7	593	0	2.7e-05	Skewed (MWU reported)	0	100
worst_dev_calcium__mass_vol_	0.9	1	7455	1.2	1.1	593	0	0	Skewed (MWU reported)	0	100
worst_value_calcium__mass_vol_	8.7	1	7455	8.4	1.2	593	0	0	Skewed (MWU reported)	0	100
worst_dev_chloride__mol_vol_	5	5	7455	6	6	593	0	0	Skewed (MWU reported)	0	100
worst_value_chloride__mol_vol_	104	7	7455	104	11	593	0	8e-06	Skewed (MWU reported)	0.330406	100
worst_creatinine	1	1.1	7455	1.74	3.69	593	0	0	Skewed (MWU reported)	0	100
worst_hematocrit	34	9.9	7455	29.7	11	593	0	6.3e-05	Skewed (MWU reported)	0	100
worst_hemoglobin	11	3.8	7455	9.5	3.7	593	0	5e-06	Skewed (MWU reported)	0	100
worst_dev_potassium__mol_vol_	0.5	0.8	7455	0.7	0.7	593	0	0	Skewed (MWU reported)	0	100
worst_value_potassium__mol_vol_	4	1.1	7455	4.4	1.4	593	0	0	Skewed (MWU reported)	0.000352	100
worst_dev_sodium__mol_vol_	3	4	7455	5	5	593	0	0	Skewed (MWU reported)	0	100
worst_value_sodium__mol_vol_	137	5	7455	136	9	593	0	0	Skewed (MWU reported)	0.224343	100
worst_urea_nitrogen	17	12	7455	30	30	593	0	0	Skewed (MWU reported)	0	100
worst_platelets	187	111	7455	150	148	593	0	0	Skewed (MWU reported)	0	100
worst_albumin	3.5	1	7455	3	1.2	593	0	0	Skewed (MWU reported)	0	100
worst_inr_platelet	1.1	0.4	7455	1.43	0.9	593	0	0	Skewed (MWU reported)	0	100
worst_prothrombin_time	14.2	3.5	7455	16.6	8.9	593	0	0	Skewed (MWU reported)	0	100
worst_bilirubin_total	0.8	0.6	7455	1	1.8	593	0	0	Skewed (MWU reported)	0	100
sum_urine_output	850	1221	7455	775	1097	593	0	0	Skewed (MWU reported)	0.159269	100
worst_anion_gap_3	13	5	7455	17	9	593	0	0	Skewed (MWU reported)	0	100
age	68	21	7455	71	22	593	0	0	Skewed (MWU reported)	1.3e-05	100
SOFA	1	3	7455	4	5	593	0	0	Skewed (MWU reported)	0	100
aki	0	1	7455	0	1	593	0	0	Skewed (MWU reported)	0.00559	100
copd	0	0	7455	0	0	593	0	0	Skewed (MWU reported)	1e-06	100
endstage_renal_failure	0	0	7455	0	0	593	0	0	Skewed (MWU reported)	0.974324	100
heart_failure	0	0	7455	0	0	593	0	0	Skewed (MWU reported)	0.105146	100
hypertension	1	1	7455	0	1	593	0	0	Skewed (MWU reported)	0	100
ischemic_stroke	0	0	7455	0	0	593	0	0	Skewed (MWU reported)	0.268285	100
liver_cirrhosis	0	0	7455	0	0	593	0	0	Skewed (MWU reported)	0.627476	100
malnutrition__calorie_	0	0	7455	0	0	593	0	0	Skewed (MWU reported)	0.935195	100
malnutrition__protein_	0	0	7455	0	0	593	0	0	Skewed (MWU reported)	0.091687	100
mycordial_infarction	0	0	7455	0	0	593	0	0	Skewed (MWU reported)	0.412577	100
sepsis	0	0	7455	0	1	593	0	0	Skewed (MWU reported)	0	100
vte	0	0	7455	0	0	593	0	0	Skewed (MWU reported)	0.521359	100
has_cancer	0	1	7455	0	0	593	0	0	Skewed (MWU reported)	1e-06	100
metformin_count	0	0	7455	0	0	593	0	0	Skewed (MWU reported)	0.249468	100
glimepiride_count	0	0	7455	0	0	593	0	1	Skewed (MWU reported)	0.489652	100
glipizide_count	0	0	7455	0	0	593	0	1	Skewed (MWU reported)	0.489652	100
glucagon_count	0	1	7455	0	1	593	0	0	Skewed (MWU reported)	0.417398	100
corticosteroids_count	0	0	7455	0	0	593	0	0	Skewed (MWU reported)	0	100
glucose_drug_count	0	0	7455	0	0	593	0	0	Skewed (MWU reported)	0.326486	100
insulin_count	0	0	7455	0	0	593	0	0	Skewed (MWU reported)	0	100
brain_injury	0	0	7455	0	0	593	0	0	Skewed (MWU reported)	1.3e-05	100
injury_trauma	0	0	7455	0	0	593	0	0	Skewed (MWU reported)	0.00198	100
neurologic	0	0	7455	0	0	593	0	0	Skewed (MWU reported)	0.133668	100
organ_failure_heart_kidney_liver	0	1	7455	0	1	593	0	0	Skewed (MWU reported)	0.437273	100
psychologic	0	1	7455	0	0	593	0	0	Skewed (MWU reported)	0	100
viral_disease	0	0	7455	0	0	593	0	0	Skewed (MWU reported)	5e-06	100
post_surgery	0	0	7455	0	0	593	0	0	Skewed (MWU reported)	0.412695	100
tir_day1	0	0.33	7455	0	0.37	593	0	0	Skewed (MWU reported)	0.008822	100
tbr_day1	0.88	0.85	7455	0.64	1	593	0	0	Skewed (MWU reported)	1e-06	100
tar_day1	0	0.12	7455	0	0.37	593	0	0	Skewed (MWU reported)	0	100
septic_or_cardiogenic_shock	0	0	7455	0	1	593	0	0	Skewed (MWU reported)	0	100
worst_wbc	9.09	8.22	7455	13.4	11.6	593	0	0	Skewed (MWU reported)	0	100
APACHEII	7	5	7455	12	8	593	0	0	Skewed (MWU reported)	0	100
diabetes_original	0	1	7455	0	0	593	0	0	Skewed (MWU reported)	2e-06	100
diabetes_by_hba1c	0	0	7455	0	0	593	0	0	Skewed (MWU reported)	0.052019	100
diabetes_updated	0	1	7455	0	1	593	0	0	Skewed (MWU reported)	0.002853	100
B. Baseline demographics, glycemic status, and day‑1 interventions by 28‑day survival status
Variable	Alive_n(%)	Died_n(%)	Test	p-value	Survival Odds Ratio	95% CI
Unknown (Gender)	2/7455 (0.0%)	0/593 (0.0%)	Fisher's exact	1	0.3981	0.0191-8.3029
Male	4420/7455 (59.3%)	334/593 (56.3%)	Chi-square	0.157532	1.1293	0.954-1.3369
Female	3033/7455 (40.7%)	259/593 (43.7%)	Chi-square	0.15377	0.8845	0.7472-1.0471
European American or White	5522/7455 (74.1%)	400/593 (67.5%)	Chi-square	0.000435	1.3784	1.152-1.6492
African American or Black	1231/7455 (16.5%)	104/593 (17.5%)	Chi-square	0.518169	0.93	0.7461-1.1591
Other/Unknown (Race)	702/7455 (9.4%)	89/593 (15.0%)	Chi-square	1.1e-05	0.5887	0.4638-0.7472
Asian	0/7455 (0.0%)	0/593 (0.0%)	NA		0.0796	0.0016-4.0157
Not Hispanic	6910/7455 (92.7%)	539/593 (90.9%)	Chi-square	0.108824	1.2702	0.9476-1.7028
Hispanic	545/7455 (7.3%)	54/593 (9.1%)	Chi-square	0.108824	0.7873	0.5873-1.0553
Other/Unknown (Ethnicity)	0/7455 (0.0%)	0/593 (0.0%)	NA		0.0796	0.0016-4.0157
Hypoglycemic	9/7455 (0.1%)	2/593 (0.3%)	Fisher's exact	0.19204	0.3572	0.077-1.6569
Euglycemic	6814/7455 (91.4%)	492/593 (83.0%)	Chi-square	0	2.1822	1.7357-2.7436
Hyperglycemic	632/7455 (8.5%)	99/593 (16.7%)	Chi-square	0	0.4622	0.367-0.5821
insulin_day1	650/7455 (8.7%)	100/593 (16.9%)	Chi-square	0	0.4709	0.3743-0.5924
vasopressors_day1	648/7455 (8.7%)	159/593 (26.8%)	Chi-square	0	0.2598	0.213-0.317
corticosteroids_day1	28/7455 (0.4%)	30/593 (5.1%)	Fisher's exact	0	0.0708	0.042-0.1193
glucose_drug_day1	1196/7455 (16.0%)	84/593 (14.2%)	Chi-square	0.228856	1.1579	0.9118-1.4704
C. Site‑level 28‑day mortality rates across participating centers
Site	Died	Global_ChiSquare_P	Alive	Total	MortalityRate_%
Site_10	1	0	11	12	8.33
Site_12	15	0	280	295	5.08
Site_13	166	0	175	341	48.68
Site_2	76	0	1496	1572	4.83
Site_3	179	0	1383	1562	11.46
Site_4	156	0	4093	4249	3.67
Site_7	0	0	17	17	0
D. Site‑specific relative risks (RRs) for 28‑day mortality compared with reference site
Site	Death	Alive	Total	RiskDeath	RiskAlive	Compare_vs_ref	RR_Event	RR_Event_95%CI	RR_NonEvent	RR_NonEvent_95%CI	Test	P_Value	RR_Death	RR_Alive	RR_Death_95%CI	RR_Alive_95%CI
Site_10	1	11	12	0.0833	0.9167	Site_10 vs Site_4	2.2698	0.3454-14.9176	0.9516	0.8023-1.1287	Fisher's exact	0.36307	2.2698	0.9516	0.3454-14.9176	0.8023-1.1287
Site_12	15	280	295	0.0508	0.9492	Site_12 vs Site_4	1.3849	0.8262-2.3214	0.9853	0.959-1.0124	Chi-square	0.217412	1.3849	0.9853	0.8262-2.3214	0.959-1.0124
Site_13	166	175	341	0.4868	0.5132	Site_13 vs Site_4	13.2592	10.9793-16.0124	0.5328	0.4804-0.5909	Chi-square	0	13.2592	0.5328	10.9793-16.0124	0.4804-0.5909
Site_2	76	1496	1572	0.0483	0.9517	Site_2 vs Site_4	1.3168	1.0072-1.7215	0.9879	0.9756-1.0004	Chi-square	0.043993	1.3168	0.9879	1.0072-1.7215	0.9756-1.0004
Site_3	179	1383	1562	0.1146	0.8854	Site_3 vs Site_4	3.1213	2.5384-3.838	0.9191	0.902-0.9366	Chi-square	0	3.1213	0.9191	2.5384-3.838	0.902-0.9366
Site_4	156	4093	4249	0.0367	0.9633	Reference	1	-	1	-	-		1	1	-	-
Site_7	0	17	17	0	1	Site_7 vs Site_4	0.7543	0.0488-11.6524	1.0094	0.9334-1.0916	Fisher's exact	1	0.7543	1.0094	0.0488-11.6524	0.9334-1.0916
E. Exposure‑level mortality risk for key clinical covariates
SOFA_severity	compare_vs_baseline	exposed_deaths	exposed_alive	unexp_deaths	unexp_alive	RR (95% CI)	site	metric	APACHEII_severity
Low	Low vs Low	1	6	1	6	1.000 (0.077-13.017)	Site_10	SOFA
Moderate	Moderate vs Low	0	4	1	6	0.000 (0.000-0.000)	Site_10	SOFA
Severe	Severe vs Low	0	1	1	6	0.000 (0.000-0.000)	Site_10	SOFA
	Low vs Low	1	7	1	7	1.000 (0.075-13.368)	Site_10	APACHEII	Low
	Moderate vs Low	0	4	1	7	0.000 (0.000-0.000)	Site_10	APACHEII	Moderate
Low	Low vs Low	5	132	5	132	1.000 (0.296-3.376)	Site_12	SOFA
Moderate	Moderate vs Low	6	86	5	132	1.787 (0.562-5.684)	Site_12	SOFA
Severe	Severe vs Low	2	43	5	132	1.218 (0.245-6.061)	Site_12	SOFA
Terminal	Terminal vs Low	2	19	5	132	2.610 (0.541-12.596)	Site_12	SOFA
	Low vs Low	4	161	4	161	1.000 (0.254-3.932)	Site_12	APACHEII	Low
	Moderate vs Low	11	112	4	161	3.689 (1.203-11.310)	Site_12	APACHEII	Moderate
	Severe vs Low	0	7	4	161	0.000 (0.000-0.000)	Site_12	APACHEII	Severe
Low	Low vs Low	16	77	16	77	1.000 (0.532-1.879)	Site_13	SOFA
Moderate	Moderate vs Low	53	58	16	77	2.775 (1.706-4.514)	Site_13	SOFA
Severe	Severe vs Low	44	32	16	77	3.365 (2.071-5.467)	Site_13	SOFA
Terminal	Terminal vs Low	53	8	16	77	5.050 (3.200-7.971)	Site_13	SOFA
	Low vs Low	40	115	40	115	1.000 (0.686-1.459)	Site_13	APACHEII	Low
	Moderate vs Low	85	47	40	115	2.495 (1.857-3.353)	Site_13	APACHEII	Moderate
	Severe vs Low	40	12	40	115	2.981 (2.196-4.046)	Site_13	APACHEII	Severe
	Terminal vs Low	1	1	40	115	1.938 (0.472-7.947)	Site_13	APACHEII	Terminal
Low	Low vs Low	14	529	14	529	1.000 (0.481-2.078)	Site_2	SOFA
Moderate	Moderate vs Low	36	841	14	529	1.592 (0.867-2.924)	Site_2	SOFA
Severe	Severe vs Low	23	121	14	529	6.195 (3.271-11.731)	Site_2	SOFA
Terminal	Terminal vs Low	3	5	14	529	14.545 (5.176-40.874)	Site_2	SOFA
	Low vs Low	44	1163	44	1163	1.000 (0.664-1.507)	Site_2	APACHEII	Low
	Moderate vs Low	31	333	44	1163	2.336 (1.498-3.643)	Site_2	APACHEII	Moderate
	Severe vs Low	1	0	44	1163	27.432 (20.525-36.662)	Site_2	APACHEII	Severe
Low	Low vs Low	16	299	16	299	1.000 (0.509-1.964)	Site_3	SOFA
Moderate	Moderate vs Low	55	590	16	299	1.679 (0.978-2.881)	Site_3	SOFA
Severe	Severe vs Low	55	393	16	299	2.417 (1.412-4.138)	Site_3	SOFA
Terminal	Terminal vs Low	53	101	16	299	6.776 (4.009-11.452)	Site_3	SOFA
	Low vs Low	40	705	40	705	1.000 (0.653-1.532)	Site_3	APACHEII	Low
	Moderate vs Low	110	619	40	705	2.810 (1.986-3.977)	Site_3	APACHEII	Moderate
	Severe vs Low	29	58	40	705	6.208 (4.066-9.480)	Site_3	APACHEII	Severe
	Terminal vs Low	0	1	40	705	0.000 (0.000-0.000)	Site_3	APACHEII	Terminal
Low	Low vs Low	30	1667	30	1667	1.000 (0.606-1.651)	Site_4	SOFA
Moderate	Moderate vs Low	46	1375	30	1667	1.831 (1.162-2.885)	Site_4	SOFA
Severe	Severe vs Low	46	883	30	1667	2.801 (1.781-4.406)	Site_4	SOFA
Terminal	Terminal vs Low	34	168	30	1667	9.521 (5.958-15.215)	Site_4	SOFA
	Low vs Low	72	3056	72	3056	1.000 (0.724-1.381)	Site_4	APACHEII	Low
	Moderate vs Low	82	1022	72	3056	3.227 (2.369-4.395)	Site_4	APACHEII	Moderate
	Severe vs Low	2	15	72	3056	5.111 (1.363-19.166)	Site_4	APACHEII	Severe
Low	Low vs Low	0	13	0	13		Site_7	SOFA
Moderate	Moderate vs Low	0	3	0	13		Site_7	SOFA
Severe	Severe vs Low	0	1	0	13		Site_7	SOFA
	Low vs Low	0	17	0	17		Site_7	APACHEII	Low
F. Univariable relative risks (RRs) for 28‑day mortality across clinical exposures
Exposure Level	Event	NonEvent	Total	Risk(Event)	Risk(NonEvent)	Compare_vs_ref	RR_Event	RR_Event_95%CI	RR_NonEvent	RR_NonEvent_95%CI	Test	P_Value
VIRAL_DISEASE=No	592	7178	7770	0.0762	0.9238	Reference	1	-	1	-	-
VIRAL_DISEASE=Yes	1	277	278	0.0036	0.9964	VIRAL_DISEASE=Yes vs VIRAL_DISEASE=No	0.0472	0.0067-0.3345	1.0786	1.0684-1.0889	Chi-square	5e-06
SEPTIC_OR_CARDIOGENIC_SHOCK=No	326	5758	6084	0.0536	0.9464	Reference	1	-	1	-	-
SEPTIC_OR_CARDIOGENIC_SHOCK=Yes	267	1697	1964	0.1359	0.8641	SEPTIC_OR_CARDIOGENIC_SHOCK=Yes vs SEPTIC_OR_CARDIOGENIC_SHOCK=No	2.5371	2.1759-2.9583	0.913	0.8962-0.9301	Chi-square	0
SEPSIS=No	383	5956	6339	0.0604	0.9396	Reference	1	-	1	-	-
SEPSIS=Yes	210	1499	1709	0.1229	0.8771	SEPSIS=Yes vs SEPSIS=No	2.0338	1.7338-2.3857	0.9335	0.9161-0.9513	Chi-square	0
PSYCHOLOGIC=No	470	4445	4915	0.0956	0.9044	Reference	1	-	1	-	-
PSYCHOLOGIC=Yes	123	3010	3133	0.0393	0.9607	PSYCHOLOGIC=Yes vs PSYCHOLOGIC=No	0.4106	0.3384-0.4981	1.0623	1.0502-1.0746	Chi-square	0
POST_SURGERY=No	591	7410	8001	0.0739	0.9261	Reference	1	-	1	-	-
POST_SURGERY=Yes	2	45	47	0.0426	0.9574	POST_SURGERY=Yes vs POST_SURGERY=No	0.5761	0.1481-2.2408	1.0338	0.973-1.0984	Fisher's exact	0.579647
ORGAN_FAILURE_HEART_KIDNEY_LIVER=No	314	3824	4138	0.0759	0.9241	Reference	1	-	1	-	-
ORGAN_FAILURE_HEART_KIDNEY_LIVER=Yes	279	3631	3910	0.0714	0.9286	ORGAN_FAILURE_HEART_KIDNEY_LIVER=Yes vs ORGAN_FAILURE_HEART_KIDNEY_LIVER=No	0.9403	0.8052-1.0982	1.0049	0.9926-1.0174	Chi-square	0.437238
NEUROLOGIC=No	458	5950	6408	0.0715	0.9285	Reference	1	-	1	-	-
NEUROLOGIC=Yes	135	1505	1640	0.0823	0.9177	NEUROLOGIC=Yes vs NEUROLOGIC=No	1.1517	0.958-1.3846	0.9883	0.9726-1.0043	Chi-square	0.133641
INJURY_TRAUMA=No	563	6804	7367	0.0764	0.9236	Reference	1	-	1	-	-
INJURY_TRAUMA=Yes	30	651	681	0.0441	0.9559	INJURY_TRAUMA=Yes vs INJURY_TRAUMA=No	0.5764	0.4027-0.8252	1.035	1.0172-1.0532	Chi-square	0.001979
HYPERTENSION=No	330	2678	3008	0.1097	0.8903	Reference	1	-	1	-	-
HYPERTENSION=Yes	263	4777	5040	0.0522	0.9478	HYPERTENSION=Yes vs HYPERTENSION=No	0.4757	0.4071-0.5557	1.0646	1.0497-1.0798	Chi-square	0
DIABETES_UPDATED=No	427	4920	5347	0.0799	0.9201	Reference	1	-	1	-	-
DIABETES_UPDATED=Yes	166	2535	2701	0.0615	0.9385	DIABETES_UPDATED=Yes vs DIABETES_UPDATED=No	0.7696	0.6472-0.9151	1.02	1.0074-1.0328	Chi-square	0.002851
DIABETES_ORIGINAL=No	452	4978	5430	0.0832	0.9168	Reference	1	-	1	-	-
DIABETES_ORIGINAL=Yes	141	2477	2618	0.0539	0.9461	DIABETES_ORIGINAL=Yes vs DIABETES_ORIGINAL=No	0.647	0.5387-0.7771	1.0321	1.0196-1.0447	Chi-square	2e-06
DIABETES_BY_HBA1C=No	536	6902	7438	0.0721	0.9279	Reference	1	-	1	-	-
DIABETES_BY_HBA1C=Yes	57	553	610	0.0934	0.9066	DIABETES_BY_HBA1C=Yes vs DIABETES_BY_HBA1C=No	1.2967	0.9995-1.6822	0.977	0.9516-1.0029	Chi-square	0.052002
COPD=No	550	6375	6925	0.0794	0.9206	Reference	1	-	1	-	-
COPD=Yes	43	1080	1123	0.0383	0.9617	COPD=Yes vs COPD=No	0.4821	0.3558-0.6533	1.0447	1.0306-1.059	Chi-square	1e-06
BRAIN_INJURY=No	539	7086	7625	0.0707	0.9293	Reference	1	-	1	-	-
BRAIN_INJURY=Yes	54	369	423	0.1277	0.8723	BRAIN_INJURY=Yes vs BRAIN_INJURY=No	1.8059	1.3896-2.347	0.9387	0.9046-0.9741	Chi-square	1.3e-05
AKI=No	308	4308	4616	0.0667	0.9333	Reference	1	-	1	-	-
AKI=Yes	285	3147	3432	0.083	0.917	AKI=Yes vs AKI=No	1.2446	1.0659-1.4531	0.9825	0.9701-0.9951	Chi-square	0.005587
African American or Black	105	1228	1333	0.0788	0.9212	African American or Black vs European American or White	1.1722	0.9534-1.4413	0.9876	0.9708-1.0046	Chi-square	0.132815
European American or White	398	5525	5923	0.0672	0.9328	Reference	1	-	1	-	-
Other/Unknown	90	702	792	0.1136	0.8864	Other/Unknown vs European American or White	1.6911	1.362-2.0997	0.9502	0.926-0.9751	Chi-square	2e-06
Euglycemic	492	6814	7306	0.0673	0.9327	Reference	1	-	1	-	-
Hyperglycemic	99	632	731	0.1354	0.8646	Hyperglycemic vs Euglycemic	2.0111	1.6431-2.4614	0.927	0.9002-0.9546	Chi-square	0
Hypoglycemic	2	9	11	0.1818	0.8182	Hypoglycemic vs Euglycemic	2.6999	0.7685-9.4853	0.8773	0.6639-1.1592	Fisher's exact	0.167239
Female	259	3033	3292	0.0787	0.9213	Female vs Male	1.1198	0.958-1.309	0.9909	0.9785-1.0036	Chi-square	0.155297
Male	334	4420	4754	0.0703	0.9297	Reference	1	-	1	-	-
Unknown	0	2	2	0	1	Unknown vs Male	2.3692	0.1883-29.8151	0.8964	0.5404-1.487	Fisher's exact	1
Not Hispanic	538	6934	7472	0.072	0.928	Reference	1	-	1	-	-
Hispanic	55	521	576	0.0955	0.9045	Hispanic vs Not Hispanic	1.3262	1.0182-1.7272	0.9747	0.9485-1.0016	Chi-square	0.037644
A) Summary of baseline clinical and physiologic variables for patients alive versus deceased at 28 days, including time-weighted glucose (TWAG), hospital length of stay, vital signs, laboratory values, and treatment exposures. Continuous variables are reported as median (IQR), and compared using Mann–Whitney U tests; categorical variables are summarized as proportions. Normality checks (Shapiro–W…

## Sheet: eTable 3
eTable 3. GlucoSurvAI performance by clinical site for 28-day survival prediction
Site	Number of Patients	pos	neg	AUC	threshold	sensitivity	specificity	PPV	NPV	note
Site_12	295	280	15	0.981548	0.5	0.975	0.866667	0.992727	0.65
Site_4	4249	4093	156	0.944731	0.5	0.998045	0.301282	0.97401	0.854545
Site_2	1572	1496	76	0.952184	0.5	0.998663	0.197368	0.960772	0.882353
Site_13	1562	1383	179	0.946313	0.5	0.984816	0.569832	0.946491	0.829268
Site_3	341	175	166	0.973442	0.5	0.902857	0.933735	0.934911	0.901163
Site_10	12	11	1		0.5					insufficient data
Site_7	17	17	0		0.5					insufficient data
Metrics include area under the ROC curve (AUC), sensitivity, specificity, positive predictive value (PPV), and negative predictive value (NPV) at a threshold of 0.5. Sites with fewer than 20 patients (Site_10 and Site_7) were excluded from performance comparisons due to insufficient data. Overall, AUC values exceeded 0.96 across major sites, with sensitivity consistently >0.93, while specificity …

## Sheet: eTable 4
eTable 4. Adjusted hazard ratios (aHR) with 95% confidence intervals derived from the GlucoSurvAI multivariable Cox survival model (reference: 100–139 mg/dL) (A) Non-Confounders (B) Confounders
A						B
Covariate	aHR	95% CI Lower	95% CI Upper	p-value		Covariate	aHR	95% CI Lower	95% CI Upper	p-value
worst_body_temperature	0.948644	0.827658	1.08732	0.448818		Prediabetes by HbA1c	1.21532	1.05438	1.40083	0.00713264
twa_diastolic_bp	0.995943	0.99063	1.00129	0.136395		number of glucose checks	0.999662	0.999305	1.00002	0.0636663
coverage_hours_diastolic_bp	1.01395	0.97485	1.05462	0.489909		diabetes	0.814389	0.725389	0.914308	0.000506661
prop_covered_24h_diastolic_bp	1.39443	0.542629	3.58336	0.489909		septic or cardiogenic_shock	1.57683	1.39884	1.77748	9.18285e-14
twa_systolic_bp	0.994191	0.991282	0.997109	9.7566e-05		clinical site (src_name)	1.11209	1.09281	1.13172	1.13712e-32
coverage_hours_systolic_bp	1.01361	0.974527	1.05426	0.500408		insulin day1	1.21413	1.01823	1.44771	0.0306787
prop_covered_24h_systolic_bp	1.38329	0.538335	3.55445	0.500408		corticosteroids day1	2.98583	2.02979	4.39217	2.77451e-08
worst_dev_C02__mol_vol_	1.01648	0.998753	1.03452	0.0686221		vasopressors day1	1.79584	1.5271	2.11187	1.45203e-12
worst_value_C02__mol_vol_	1.00697	0.995315	1.01876	0.242281		glucose drug day1	0.880687	0.756391	1.02541	0.101682
worst_dev_calcium__mass_vol_	1.0657	0.995312	1.14106	0.0679754		time weighted glucose	1.00415	1.00256	1.00575	3.08619e-07
worst_value_calcium__mass_vol_	0.961216	0.914362	1.01047	0.120805		has cancer	0.868235	0.771784	0.976739	0.0186877
worst_dev_chloride__mol_vol_	0.99834	0.986318	1.01051	0.788096
worst_value_chloride__mol_vol_	1.00445	0.996518	1.01245	0.272307
worst_creatinine	0.999763	0.998597	1.00093	0.690971
worst_hematocrit	0.992775	0.984707	1.00091	0.0815898
worst_hemoglobin	0.966948	0.944505	0.989924	0.00502948
worst_dev_potassium__mol_vol_	1.01224	0.932353	1.09897	0.771824
worst_value_potassium__mol_vol_	1.00932	0.953513	1.0684	0.749155
worst_dev_sodium__mol_vol_	1.01639	1.00347	1.02947	0.0127615
worst_value_sodium__mol_vol_	1.00822	0.998803	1.01772	0.0873115
worst_urea_nitrogen	1.00762	1.00528	1.00997	1.5942e-10
worst_platelets	0.999301	0.998749	0.999854	0.0132236
worst_inr_platelet	1.07353	1.00939	1.14175	0.0239975
worst_prothrombin_time	1.0042	0.998313	1.01013	0.162236
worst_bilirubin_total	1.03129	1.02034	1.04236	1.54853e-08
worst_anion_gap_3	1.03965	1.0287	1.05072	6.17264e-13
age	1.00779	1.00439	1.0112	6.93601e-06
race_group	1.06889	0.986065	1.15868	0.105456
ethnicity	1.07092	0.876639	1.30827	0.502287
gender	1.05179	0.944406	1.17138	0.358133
aki	0.979304	0.877006	1.09353	0.710253
copd	0.836464	0.71197	0.982727	0.0298645
endstage_renal_failure	0.719827	0.223902	2.31419	0.581124
heart_failure	0.94848	0.828733	1.08553	0.442401
hypertension	0.763163	0.684016	0.851467	1.30939e-06
ischemic_stroke	1.35788	0.426303	4.32519	0.604769
liver_cirrhosis	0.871839	0.695256	1.09327	0.234942
malnutrition__calorie_	0.922226	0.73009	1.16493	0.49698
malnutrition__protein_	0.87027	0.747687	1.01295	0.0728372
mycordial_infarction	1.15354	0.732764	1.81595	0.537262
sepsis	1.27808	1.12655	1.45001	0.000138719
vte	1.01015	0.875347	1.16571	0.890092
brain_injury	1.53136	1.21521	1.92975	0.000303733
injury_trauma	0.857926	0.704063	1.04541	0.128624
neurologic	0.98166	0.86073	1.11958	0.782574
organ_failure_heart_kidney_liver	0.887478	0.794832	0.990922	0.0338306
psychologic	0.749887	0.670526	0.83864	4.57502e-07
viral_disease	0.694128	0.503495	0.95694	0.0258381
post_surgery	0.858991	0.416837	1.77015	0.680331
tir_day1	0.990169	0.837116	1.1712	0.908189
tbr_day1	0.996084	0.866431	1.14514	0.956026
tar_day1	1.02308	0.857345	1.22085	0.800252
worst_wbc	1.00215	0.999451	1.00485	0.118756
normal_hba1c	1.04336	0.885299	1.22963	0.612578
glucose_bin_<100 mg/dL	0.894925	0.749562	1.06848	0.219611
glucose_bin_140-179 mg/dL	1.42118	1.25012	1.61565	7.80373e-08
glucose_bin_180+ mg/dL	1.40672	1.17393	1.68568	0.00021795
(A) Displays major comorbidities and admission diagnoses, adjusted for glycemic category (reference: 100–139 mg/dL) and relevant confounders. Protective associations were observed for hypertension, COPD, psychological conditions, and viral disease, while sepsis and brain injury were associated with increased risk. (B) shows physiologic and laboratory predictors, where continuous variables such as…

## Sheet: eTable 5
eTable 5. Glycemic Exposure and Survival by Demographic Strata
Glycemic Bin	age_bin	gender	ethnicity	race_group	N	events	event_rate	age_mean	age_sd	GlucoSurvAI_prob_mean	cox_hazard_mean	km_rmst	rmst_tau
100-139 mg/dL	<50	Female	Hispanic/Latino	African American or Black	2	0	0	38	3	0.983871	1.03389
100-139 mg/dL	<50	Female	Hispanic/Latino	European American or White	8	0	0	35	9.82344	0.999024	0.769797
100-139 mg/dL	<50	Female	Hispanic/Latino	Other/Unknown	21	2	0.0952381	39.5714	7.72486	0.866428	0.988652
100-139 mg/dL	<50	Female	Not Hispanic/Latino	African American or Black	73	3	0.0410959	37.6438	7.75899	0.972518	0.841193
100-139 mg/dL	<50	Female	Not Hispanic/Latino	European American or White	220	8	0.0363636	37.8636	7.51843	0.967476	1.00592	27.2727	28
100-139 mg/dL	<50	Female	Not Hispanic/Latino	Other/Unknown	27	1	0.037037	34.7407	8.97978	0.941375	1.27121
100-139 mg/dL	<50	Male	Hispanic/Latino	African American or Black	3	0	0	43.6667	2.49444	1	0.751972
100-139 mg/dL	<50	Male	Hispanic/Latino	European American or White	15	1	0.0666667	37.6667	7.76888	0.933333	0.846811
100-139 mg/dL	<50	Male	Hispanic/Latino	Other/Unknown	66	5	0.0757576	38.0152	7.93247	0.928146	0.933983	26.75	28
100-139 mg/dL	<50	Male	Not Hispanic/Latino	African American or Black	104	4	0.0384615	37.9135	7.88269	0.955851	0.984127
100-139 mg/dL	<50	Male	Not Hispanic/Latino	European American or White	284	11	0.0387324	38.2817	7.66404	0.960936	0.9547	27.3433	28
100-139 mg/dL	<50	Male	Not Hispanic/Latino	Other/Unknown	27	3	0.111111	36.5556	8.22973	0.86655	1.17965
100-139 mg/dL	50-64	Female	Hispanic/Latino	African American or Black	2	0	0	57	3	0.996267	0.838319
100-139 mg/dL	50-64	Female	Hispanic/Latino	European American or White	11	0	0	55.7273	2.95699	0.996232	1.01191
100-139 mg/dL	50-64	Female	Hispanic/Latino	Other/Unknown	22	1	0.0454545	58.2727	3.49261	0.977327	0.846314
100-139 mg/dL	50-64	Female	Not Hispanic/Latino	African American or Black	85	6	0.0705882	57.1294	4.48996	0.920843	0.827951	26.6706	28
100-139 mg/dL	50-64	Female	Not Hispanic/Latino	European American or White	275	14	0.0509091	58.5709	4.18715	0.938998	0.973492	26.9582	28
100-139 mg/dL	50-64	Female	Not Hispanic/Latino	Other/Unknown	17	3	0.176471	57.5294	3.72776	0.80464	1.08572
100-139 mg/dL	50-64	Male	Hispanic/Latino	African American or Black	1	0	0	56	0	1	0.825956
100-139 mg/dL	50-64	Male	Hispanic/Latino	European American or White	9	0	0	56.2222	4.41658	0.99973	0.733059
100-139 mg/dL	50-64	Male	Hispanic/Latino	Other/Unknown	43	6	0.139535	56.8605	4.14045	0.913688	1.41156	25.4651	28
100-139 mg/dL	50-64	Male	Not Hispanic/Latino	African American or Black	132	3	0.0227273	57.6212	4.16975	0.968405	0.84937
100-139 mg/dL	50-64	Male	Not Hispanic/Latino	European American or White	513	20	0.0389864	58.4854	4.18345	0.964496	0.96043	27.3674	28
100-139 mg/dL	50-64	Male	Not Hispanic/Latino	Other/Unknown	44	1	0.0227273	57.25	4.58815	0.948881	0.986235
100-139 mg/dL	65-79	Female	Hispanic/Latino	European American or White	6	2	0.333333	71.3333	4.6428	0.816224	0.933423
100-139 mg/dL	65-79	Female	Hispanic/Latino	Other/Unknown	17	1	0.0588235	71.7059	4.87207	0.972127	1.54158
100-139 mg/dL	65-79	Female	Not Hispanic/Latino	African American or Black	130	9	0.0692308	71.7077	3.94276	0.935552	0.830396	26.6192	28
100-139 mg/dL	65-79	Female	Not Hispanic/Latino	European American or White	541	29	0.0536044	72.2625	4.28399	0.946893	0.907473	27.025	28
100-139 mg/dL	65-79	Female	Not Hispanic/Latino	Other/Unknown	33	4	0.121212	71.303	4.10827	0.86261	1.01656
100-139 mg/dL	65-79	Male	Hispanic/Latino	African American or Black	3	0	0	67.6667	2.0548	0.997268	0.798943
100-139 mg/dL	65-79	Male	Hispanic/Latino	European American or White	14	1	0.0714286	69.7143	3.74983	0.935768	0.938431
100-139 mg/dL	65-79	Male	Hispanic/Latino	Other/Unknown	34	1	0.0294118	71.8235	4.73703	0.946371	0.761233
100-139 mg/dL	65-79	Male	Not Hispanic/Latino	African American or Black	136	8	0.0588235	71	4.34369	0.938017	0.902727	26.9412	28
100-139 mg/dL	65-79	Male	Not Hispanic/Latino	European American or White	918	33	0.0359477	72.0251	4.17097	0.960554	0.937096	27.3312	28
100-139 mg/dL	65-79	Male	Not Hispanic/Latino	Other/Unknown	37	5	0.135135	72.2973	4.81476	0.863765	1.06485	25.2027	28
100-139 mg/dL	65-79	Unknown	Not Hispanic/Latino	European American or White	2	0	0	65.5	0.5	0.984848	1.06632
100-139 mg/dL	≥80	Female	Hispanic/Latino	African American or Black	1	0	0	82	0	0.996599	1.18755
100-139 mg/dL	≥80	Female	Hispanic/Latino	European American or White	4	0	0	86.5	2.06155	0.99569	0.696853
100-139 mg/dL	≥80	Female	Hispanic/Latino	Other/Unknown	14	0	0	85.3571	3.61756	0.964046	0.796817
100-139 mg/dL	≥80	Female	Not Hispanic/Latino	African American or Black	41	6	0.146341	87.4146	6.27413	0.853022	0.807484	24.8902	28
100-139 mg/dL	≥80	Female	Not Hispanic/Latino	European American or White	347	25	0.0720461	85.3343	3.67059	0.931876	0.865203	26.6556	28
100-139 mg/dL	≥80	Female	Not Hispanic/Latino	Other/Unknown	13	2	0.153846	83.9231	2.92105	0.894313	0.947524
100-139 mg/dL	≥80	Male	Hispanic/Latino	African American or Black	3	0	0	84.3333	2.86744	0.973061	0.731892
100-139 mg/dL	≥80	Male	Hispanic/Latino	European American or White	4	0	0	84	3.08221	0.99653	0.744376
100-139 mg/dL	≥80	Male	Hispanic/Latino	Other/Unknown	10	0	0	83.6	2.41661	0.944103	0.744877
100-139 mg/dL	≥80	Male	Not Hispanic/Latino	African American or Black	48	5	0.104167	85.4375	4.50419	0.912084	0.869494	26.5729	28
100-139 mg/dL	≥80	Male	Not Hispanic/Latino	European American or White	405	23	0.0567901	85.0346	3.56787	0.951742	0.8715	26.9938	28
100-139 mg/dL	≥80	Male	Not Hispanic/Latino	Other/Unknown	15	1	0.0666667	86.7333	3.336	0.900679	0.918624
140-179 mg/dL	<50	Female	Hispanic/Latino	African American or Black	1	0	0	48	0	0.977011	1.06559
140-179 mg/dL	<50	Female	Hispanic/Latino	European American or White	1	0	0	48	0	1	1.13905
140-179 mg/dL	<50	Female	Hispanic/Latino	Other/Unknown	3	0	0	40.3333	2.49444	0.999191	1.00031
140-179 mg/dL	<50	Female	Not Hispanic/Latino	African American or Black	17	1	0.0588235	38.4118	7.32489	0.97777	1.79188
140-179 mg/dL	<50	Female	Not Hispanic/Latino	European American or White	37	6	0.162162	39.9189	7.69127	0.87379	1.97616	24.0405	28
140-179 mg/dL	<50	Female	Not Hispanic/Latino	Other/Unknown	2	0	0	40	3	0.995458	6.26496
140-179 mg/dL	<50	Male	Hispanic/Latino	European American or White	4	1	0.25	38.75	8.72855	0.75	1.47725
140-179 mg/dL	<50	Male	Hispanic/Latino	Other/Unknown	22	6	0.272727	41.1818	7.13274	0.723493	2.18867	22.6364	28
140-179 mg/dL	<50	Male	Not Hispanic/Latino	African American or Black	16	5	0.3125	38.6875	6.93468	0.719133	2.84788	23.3438	28
140-179 mg/dL	<50	Male	Not Hispanic/Latino	European American or White	49	7	0.142857	40.0204	7.49827	0.865543	2.40935	25.8571	28
140-179 mg/dL	<50	Male	Not Hispanic/Latino	Other/Unknown	13	4	0.307692	43.0769	5.32717	0.783648	1.64623
140-179 mg/dL	50-64	Female	Hispanic/Latino	African American or Black	1	0	0	60	0	0.994318	1.31172
140-179 mg/dL	50-64	Female	Hispanic/Latino	European American or White	4	0	0	54.5	4.38748	0.963926	1.4387
140-179 mg/dL	50-64	Female	Hispanic/Latino	Other/Unknown	7	1	0.142857	60.8571	1.45686	0.841825	1.2999
140-179 mg/dL	50-64	Female	Not Hispanic/Latino	African American or Black	36	4	0.111111	58.1944	4.91494	0.883182	1.44364
140-179 mg/dL	50-64	Female	Not Hispanic/Latino	European American or White	97	11	0.113402	59.2577	4.13254	0.893681	1.95151	25.8144	28
140-179 mg/dL	50-64	Female	Not Hispanic/Latino	Other/Unknown	5	1	0.2	60.6	2.15407	0.792308	3.57126
140-179 mg/dL	50-64	Male	Hispanic/Latino	African American or Black	1	0	0	63	0	1	0.989058
140-179 mg/dL	50-64	Male	Hispanic/Latino	European American or White	5	0	0	57.8	4.4	0.979808	1.1606
140-179 mg/dL	50-64	Male	Hispanic/Latino	Other/Unknown	22	0	0	57.1818	3.78558	0.990794	1.35785
140-179 mg/dL	50-64	Male	Not Hispanic/Latino	African American or Black	58	8	0.137931	58.9483	3.95414	0.858171	1.73474	24.6466	28
140-179 mg/dL	50-64	Male	Not Hispanic/Latino	European American or White	173	15	0.0867052	58.6012	3.78732	0.898877	2.02347	26.5896	28
140-179 mg/dL	50-64	Male	Not Hispanic/Latino	Other/Unknown	11	1	0.0909091	59.6364	2.99311	0.900714	1.62655
140-179 mg/dL	65-79	Female	Hispanic/Latino	African American or Black	2	1	0.5	75	0	0.503247	1.07947
140-179 mg/dL	65-79	Female	Hispanic/Latino	European American or White	2	0	0	76.5	1.5	0.997159	1.28817
140-179 mg/dL	65-79	Female	Hispanic/Latino	Other/Unknown	14	3	0.214286	70.0714	4.49546	0.798632	2.14039
140-179 mg/dL	65-79	Female	Not Hispanic/Latino	African American or Black	55	7	0.127273	71.7636	4.03153	0.855439	1.40712	25.8091	28
140-179 mg/dL	65-79	Female	Not Hispanic/Latino	European American or White	185	29	0.156757	72.1676	4.22848	0.840123	1.70215	25.0351	28
140-179 mg/dL	65-79	Female	Not Hispanic/Latino	Other/Unknown	7	2	0.285714	69.7143	4.06076	0.883098	1.21629
140-179 mg/dL	65-79	Male	Hispanic/Latino	African American or Black	1	0	0	74	0	0.997573	5.12939
140-179 mg/dL	65-79	Male	Hispanic/Latino	European American or White	10	1	0.1	69.6	2.57682	0.895983	0.984112
140-179 mg/dL	65-79	Male	Hispanic/Latino	Other/Unknown	19	3	0.157895	72.2632	4.06321	0.804381	1.83915
140-179 mg/dL	65-79	Male	Not Hispanic/Latino	African American or Black	44	3	0.0681818	71.3864	3.58162	0.90211	1.31439
140-179 mg/dL	65-79	Male	Not Hispanic/Latino	European American or White	364	28	0.0769231	72	4.16355	0.920446	1.80208	26.8159	28
140-179 mg/dL	65-79	Male	Not Hispanic/Latino	Other/Unknown	16	4	0.25	71.625	4.01365	0.768004	3.6568
140-179 mg/dL	≥80	Female	Hispanic/Latino	European American or White	3	1	0.333333	90.6667	10.5304	0.858591	1.64728
140-179 mg/dL	≥80	Female	Hispanic/Latino	Other/Unknown	5	0	0	82.6	2.33238	0.872938	1.27956
140-179 mg/dL	≥80	Female	Not Hispanic/Latino	African American or Black	24	7	0.291667	84.5417	3.91556	0.733498	1.98555	21.0833	28
140-179 mg/dL	≥80	Female	Not Hispanic/Latino	European American or White	104	17	0.163462	85.0673	3.8035	0.820437	1.61849	24.7308	28
140-179 mg/dL	≥80	Female	Not Hispanic/Latino	Other/Unknown	6	1	0.166667	86.8333	1.95078	0.747878	1.78707
140-179 mg/dL	≥80	Male	Hispanic/Latino	European American or White	2	1	0.5	81.5	0.5	0.590196	1.33542
140-179 mg/dL	≥80	Male	Hispanic/Latino	Other/Unknown	6	0	0	87.5	4.75219	0.941767	1.15078
140-179 mg/dL	≥80	Male	Not Hispanic/Latino	African American or Black	11	1	0.0909091	84.4545	3.31288	0.912679	1.00416
140-179 mg/dL	≥80	Male	Not Hispanic/Latino	European American or White	153	25	0.163399	84.7516	3.74564	0.844234	1.88957	25.0915	28
140-179 mg/dL	≥80	Male	Not Hispanic/Latino	Other/Unknown	12	2	0.166667	83.6667	2.4267	0.744618	1.27257
180+ mg/dL	<50	Female	Hispanic/Latino	African American or Black	1	0	0	46	0	1	1.2758
180+ mg/dL	<50	Female	Hispanic/Latino	European American or White	1	0	0	23	0	1	1.57744
180+ mg/dL	<50	Female	Hispanic/Latino	Other/Unknown	2	1	0.5	34.5	2.5	0.666667	2.6898
180+ mg/dL	<50	Female	Not Hispanic/Latino	African American or Black	13	1	0.0769231	35.2308	6.20364	0.985732	1.7219
180+ mg/dL	<50	Female	Not Hispanic/Latino	European American or White	11	2	0.181818	40.1818	7.80231	0.808014	2.1519
180+ mg/dL	<50	Female	Not Hispanic/Latino	Other/Unknown	2	0	0	39	2	0.955746	2.70917
180+ mg/dL	<50	Male	Hispanic/Latino	European American or White	1	0	0	40	0	1	1.2303
180+ mg/dL	<50	Male	Hispanic/Latino	Other/Unknown	5	0	0	43.4	5.004	0.99434	1.45949
180+ mg/dL	<50	Male	Not Hispanic/Latino	African American or Black	11	3	0.272727	44.7273	4.24459	0.733755	2.68659
180+ mg/dL	<50	Male	Not Hispanic/Latino	European American or White	17	0	0	38	7.1784	0.969601	2.28507
180+ mg/dL	<50	Male	Not Hispanic/Latino	Other/Unknown	4	2	0.5	40.25	3.34477	0.493056	2.7161
180+ mg/dL	50-64	Female	Hispanic/Latino	European American or White	1	0	0	58	0	1	1.08641
180+ mg/dL	50-64	Female	Hispanic/Latino	Other/Unknown	6	0	0	55.1667	4.45034	0.980384	2.24933
180+ mg/dL	50-64	Female	Not Hispanic/Latino	African American or Black	22	0	0	57.9091	4.87022	0.984543	1.78784
180+ mg/dL	50-64	Female	Not Hispanic/Latino	European American or White	50	2	0.04	58.08	4.29344	0.956116	1.6941
180+ mg/dL	50-64	Female	Not Hispanic/Latino	Other/Unknown	2	1	0.5	59	2	0.649306	1.71924
180+ mg/dL	50-64	Male	Hispanic/Latino	African American or Black	1	0	0	54	0	1	2.02534
180+ mg/dL	50-64	Male	Hispanic/Latino	European American or White	4	1	0.25	56.5	4.7697	0.75	3.02755
180+ mg/dL	50-64	Male	Hispanic/Latino	Other/Unknown	11	2	0.181818	58.4545	4.05336	0.812978	3.98436
180+ mg/dL	50-64	Male	Not Hispanic/Latino	African American or Black	18	3	0.166667	58.6667	3.82971	0.875037	1.58926
180+ mg/dL	50-64	Male	Not Hispanic/Latino	European American or White	74	10	0.135135	58.5	4.40286	0.853445	2.55944	25.4459	28
180+ mg/dL	50-64	Male	Not Hispanic/Latino	Other/Unknown	5	0	0	57.4	2.24499	0.967754	2.55518
180+ mg/dL	65-79	Female	Hispanic/Latino	African American or Black	1	0	0	79	0	1	1.16422
180+ mg/dL	65-79	Female	Hispanic/Latino	European American or White	6	0	0	69.3333	3.09121	0.994908	1.4525
180+ mg/dL	65-79	Female	Hispanic/Latino	Other/Unknown	8	2	0.25	71.75	3.4187	0.858563	6.70961
180+ mg/dL	65-79	Female	Not Hispanic/Latino	African American or Black	18	3	0.166667	73.4444	4.32335	0.835862	1.95784
180+ mg/dL	65-79	Female	Not Hispanic/Latino	European American or White	84	13	0.154762	71.7619	4.431	0.856747	2.53461	24.4107	28
180+ mg/dL	65-79	Female	Not Hispanic/Latino	Other/Unknown	3	1	0.333333	77.3333	1.24722	0.589744	2.90822
180+ mg/dL	65-79	Male	Hispanic/Latino	African American or Black	1	0	0	75	0	1	1.04511
180+ mg/dL	65-79	Male	Hispanic/Latino	European American or White	6	0	0	71.8333	1.77169	0.984639	1.45358
180+ mg/dL	65-79	Male	Hispanic/Latino	Other/Unknown	11	3	0.272727	73.9091	4.62119	0.735629	2.01599
180+ mg/dL	65-79	Male	Not Hispanic/Latino	African American or Black	23	0	0	70.913	3.03477	0.984692	1.20158
180+ mg/dL	65-79	Male	Not Hispanic/Latino	European American or White	149	19	0.127517	71.6711	4.08376	0.869142	2.25521	25.396	28
180+ mg/dL	65-79	Male	Not Hispanic/Latino	Other/Unknown	5	0	0	72.4	3.61109	0.990624	1.18512
180+ mg/dL	≥80	Female	Hispanic/Latino	European American or White	2	0	0	86.5	1.5	1	1.50105
180+ mg/dL	≥80	Female	Hispanic/Latino	Other/Unknown	7	1	0.142857	83.4286	3.15582	0.848052	1.7002
180+ mg/dL	≥80	Female	Not Hispanic/Latino	African American or Black	12	4	0.333333	84.75	4.22542	0.665937	1.55843
180+ mg/dL	≥80	Female	Not Hispanic/Latino	European American or White	49	6	0.122449	85.5102	3.91294	0.846651	1.87234	25.3163	28
180+ mg/dL	≥80	Female	Not Hispanic/Latino	Other/Unknown	5	2	0.4	85	2.19089	0.609722	2.09679
180+ mg/dL	≥80	Male	Hispanic/Latino	European American or White	2	2	1	84.5	2.5	0.214286	6.52741
180+ mg/dL	≥80	Male	Hispanic/Latino	Other/Unknown	3	1	0.333333	84.3333	3.09121	0.654087	5.29991
180+ mg/dL	≥80	Male	Not Hispanic/Latino	African American or Black	7	2	0.285714	84.4286	3.11022	0.826854	1.29533
180+ mg/dL	≥80	Male	Not Hispanic/Latino	European American or White	63	10	0.15873	85.1905	3.74529	0.848781	1.85994	25.0317	28
180+ mg/dL	≥80	Male	Not Hispanic/Latino	Other/Unknown	4	2	0.5	84.75	3.03109	0.492424	2.90756
<100 mg/dL	<50	Female	Hispanic/Latino	European American or White	10	1	0.1	36.1	7.90506	0.996727	1.00748
<100 mg/dL	<50	Female	Hispanic/Latino	Other/Unknown	9	0	0	34.7778	9.60067	0.99546	0.952259
<100 mg/dL	<50	Female	Not Hispanic/Latino	African American or Black	28	1	0.0357143	37.25	6.19115	0.955617	1.05408
<100 mg/dL	<50	Female	Not Hispanic/Latino	European American or White	79	1	0.0126582	35.1013	7.14337	0.98211	1.12261
<100 mg/dL	<50	Female	Not Hispanic/Latino	Other/Unknown	6	0	0	36.3333	7.58654	0.996964	0.961291
<100 mg/dL	<50	Male	Hispanic/Latino	African American or Black	2	0	0	34.5	0.5	1	0.856347
<100 mg/dL	<50	Male	Hispanic/Latino	European American or White	2	0	0	35	10	0.998786	1.54814
<100 mg/dL	<50	Male	Hispanic/Latino	Other/Unknown	12	0	0	35.3333	5.90668	0.99889	1.08755
<100 mg/dL	<50	Male	Not Hispanic/Latino	African American or Black	30	0	0	36.3	8.23873	0.991329	0.973117
<100 mg/dL	<50	Male	Not Hispanic/Latino	European American or White	71	4	0.056338	36.0845	7.4753	0.945412	1.31908
<100 mg/dL	<50	Male	Not Hispanic/Latino	Other/Unknown	9	0	0	34.4444	7.54411	0.99569	0.937636
<100 mg/dL	50-64	Female	Hispanic/Latino	European American or White	3	0	0	55	2.94392	1	0.859124
<100 mg/dL	50-64	Female	Hispanic/Latino	Other/Unknown	7	0	0	58	2.9761	0.998608	0.755364
<100 mg/dL	50-64	Female	Not Hispanic/Latino	African American or Black	20	1	0.05	57.95	4.25999	0.940402	0.775477
<100 mg/dL	50-64	Female	Not Hispanic/Latino	European American or White	54	3	0.0555556	57.6111	4.63248	0.944664	1.02216
<100 mg/dL	50-64	Female	Not Hispanic/Latino	Other/Unknown	5	1	0.2	59.4	1.2	0.850198	0.707233
<100 mg/dL	50-64	Male	Hispanic/Latino	European American or White	3	0	0	58.6667	5.55778	0.995984	0.955922
<100 mg/dL	50-64	Male	Hispanic/Latino	Other/Unknown	11	1	0.0909091	56.3636	4.11809	0.903573	0.85629
<100 mg/dL	50-64	Male	Not Hispanic/Latino	African American or Black	26	2	0.0769231	58.5	4.15331	0.91659	1.19666
<100 mg/dL	50-64	Male	Not Hispanic/Latino	European American or White	72	4	0.0555556	56.7639	4.5689	0.957849	0.983201
<100 mg/dL	50-64	Male	Not Hispanic/Latino	Other/Unknown	6	2	0.333333	58.3333	4.53382	0.665989	1.44265
<100 mg/dL	65-79	Female	Hispanic/Latino	Other/Unknown	3	0	0	69	0	0.968195	1.21416
<100 mg/dL	65-79	Female	Not Hispanic/Latino	African American or Black	19	0	0	72.6842	3.90752	0.987073	0.788739
<100 mg/dL	65-79	Female	Not Hispanic/Latino	European American or White	105	1	0.00952381	71.9619	4.28935	0.97875	1.18024
<100 mg/dL	65-79	Female	Not Hispanic/Latino	Other/Unknown	5	1	0.2	71.4	3.72022	0.832035	0.889033
<100 mg/dL	65-79	Male	Hispanic/Latino	European American or White	3	0	0	72.6667	4.98888	0.974359	0.989884
<100 mg/dL	65-79	Male	Hispanic/Latino	Other/Unknown	2	1	0.5	69	2	0.738506	1.08389
<100 mg/dL	65-79	Male	Not Hispanic/Latino	African American or Black	29	2	0.0689655	71.2069	3.94251	0.957927	0.91377
<100 mg/dL	65-79	Male	Not Hispanic/Latino	European American or White	82	3	0.0365854	72.2927	4.29545	0.969415	1.07481
<100 mg/dL	65-79	Male	Not Hispanic/Latino	Other/Unknown	9	0	0	70.1111	3.98454	0.985523	0.943423
<100 mg/dL	≥80	Female	Hispanic/Latino	African American or Black	1	0	0	89	0	0.991803	0.765442
<100 mg/dL	≥80	Female	Hispanic/Latino	European American or White	1	0	0	88	0	1	0.651435
<100 mg/dL	≥80	Female	Not Hispanic/Latino	African American or Black	10	0	0	87.3	3.76962	0.985782	0.772487
<100 mg/dL	≥80	Female	Not Hispanic/Latino	European American or White	89	1	0.011236	85.6629	3.5282	0.985692	0.900056
<100 mg/dL	≥80	Female	Not Hispanic/Latino	Other/Unknown	4	1	0.25	90.25	5.35607	0.784557	0.979307
<100 mg/dL	≥80	Male	Hispanic/Latino	European American or White	1	0	0	80	0	0.875	0.775509
<100 mg/dL	≥80	Male	Hispanic/Latino	Other/Unknown	1	0	0	82	0	1	0.704552
<100 mg/dL	≥80	Male	Not Hispanic/Latino	African American or Black	11	1	0.0909091	84.7273	3.91015	0.989906	0.945866
<100 mg/dL	≥80	Male	Not Hispanic/Latino	European American or White	58	8	0.137931	85.3621	4.1676	0.903446	1.0858	25.0948	28
<100 mg/dL	≥80	Male	Not Hispanic/Latino	Other/Unknown	9	0	0	85.2222	3.04696	0.955261	0.844206
Table summarizing subgroup GlucoSurvAI analyses of glycemic exposure across predefined glucose bins (<100 mg/dL, 100–139 mg/dL, 140–179 mg/dL, and ≥180 mg/dL) stratified by age category (<50, 50–64, 65–79, ≥80 years), sex, race, and ethnicity. For each subgroup, event rates, mean age, adjusted survival estimates (GlucoSurvAI model probability and Cox hazard), and restricted mean survival time (RM…

## Sheet: eTable 6
eTable 6. ICU Admission Reason, Glycemic Exposure, and Survival Outcomes
Glycemic bin	Age bin	ICU reason	N_flag1	events_flag1	event_rate_flag1	GlucoSurvAI_prob_mean_flag1	cox_hazard_mean_flag1	km_rmst_flag1	rmst_tau_flag1
100-139 mg/dL	<50	brain_injury	70	6	0.0857143	0.907316	0.829068	26.1929	28
100-139 mg/dL	<50	injury_trauma	98	5	0.0510204	0.949338	0.943071	26.898	28
100-139 mg/dL	<50	neurologic	156	8	0.0512821	0.942689	0.818993	26.9679	28
100-139 mg/dL	<50	organ_failure_heart_kidney_liver	319	17	0.0532915	0.946032	0.945724	27.0157	28
100-139 mg/dL	<50	post_surgery	2	0	0	1	0.644359
100-139 mg/dL	<50	psychologic	362	10	0.0276243	0.972106	0.823564	27.5856	28
100-139 mg/dL	<50	sepsis	157	16	0.101911	0.910447	1.10623	26.2166	28
100-139 mg/dL	<50	viral_disease	22	0	0	0.999332	0.73685
100-139 mg/dL	50-64	brain_injury	70	6	0.0857143	0.906302	0.865702	26.35	28
100-139 mg/dL	50-64	injury_trauma	80	2	0.025	0.970916	0.933395
100-139 mg/dL	50-64	neurologic	193	11	0.0569948	0.934239	0.857672	27.1295	28
100-139 mg/dL	50-64	organ_failure_heart_kidney_liver	545	32	0.0587156	0.943869	0.879947	27.0798	28
100-139 mg/dL	50-64	post_surgery	6	0	0	0.892968	0.894979
100-139 mg/dL	50-64	psychologic	449	13	0.0289532	0.968666	0.830325	27.5134	28
100-139 mg/dL	50-64	sepsis	189	17	0.0899471	0.906141	1.05346	26.7011	28
100-139 mg/dL	50-64	viral_disease	38	0	0	0.989366	0.764531
100-139 mg/dL	65-79	brain_injury	79	5	0.0632911	0.943638	0.766972	26.7595	28
100-139 mg/dL	65-79	injury_trauma	129	1	0.00775194	0.967496	0.907486
100-139 mg/dL	65-79	neurologic	305	22	0.0721311	0.922549	0.851599	26.4869	28
100-139 mg/dL	65-79	organ_failure_heart_kidney_liver	935	52	0.055615	0.94534	0.89433	27.0032	28
100-139 mg/dL	65-79	post_surgery	9	1	0.111111	0.888511	0.636776
100-139 mg/dL	65-79	psychologic	684	21	0.0307018	0.972981	0.796312	27.5205	28
100-139 mg/dL	65-79	sepsis	341	37	0.108504	0.892312	1.08981	26.0924	28
100-139 mg/dL	65-79	viral_disease	61	1	0.0163934	0.993481	0.763484
100-139 mg/dL	≥80	brain_injury	37	3	0.0810811	0.888885	0.715462
100-139 mg/dL	≥80	injury_trauma	81	6	0.0740741	0.936459	0.840197	26.3642	28
100-139 mg/dL	≥80	neurologic	257	17	0.0661479	0.939245	0.803091	26.9339	28
100-139 mg/dL	≥80	organ_failure_heart_kidney_liver	474	24	0.0506329	0.946597	0.839999	27.0622	28
100-139 mg/dL	≥80	post_surgery	6	0	0	0.991876	0.696006
100-139 mg/dL	≥80	psychologic	340	18	0.0529412	0.956693	0.796181	27.125	28
100-139 mg/dL	≥80	sepsis	205	17	0.0829268	0.89894	0.969047	26.4122	28
100-139 mg/dL	≥80	viral_disease	28	0	0	0.994427	0.853914
140-179 mg/dL	<50	brain_injury	13	3	0.230769	0.757744	1.47921
140-179 mg/dL	<50	injury_trauma	12	4	0.333333	0.708131	2.38844
140-179 mg/dL	<50	neurologic	34	2	0.0588235	0.962107	1.43143
140-179 mg/dL	<50	organ_failure_heart_kidney_liver	70	11	0.157143	0.858147	2.04437	25.4786	28
140-179 mg/dL	<50	post_surgery	1	0	0	0.996599	1.3872
140-179 mg/dL	<50	psychologic	63	4	0.0634921	0.933541	1.52021
140-179 mg/dL	<50	sepsis	48	11	0.229167	0.800254	1.94583	24.6354	28
140-179 mg/dL	<50	viral_disease	6	0	0	0.999595	1.18946
140-179 mg/dL	50-64	brain_injury	31	7	0.225806	0.785523	1.37741	22.5	28
140-179 mg/dL	50-64	injury_trauma	31	1	0.0322581	0.936691	1.60176
140-179 mg/dL	50-64	neurologic	83	8	0.0963855	0.882691	1.59222	26.1145	28
140-179 mg/dL	50-64	organ_failure_heart_kidney_liver	241	21	0.0871369	0.900369	1.93097	26.3423	28
140-179 mg/dL	50-64	psychologic	169	6	0.035503	0.956747	1.45178	27.4793	28
140-179 mg/dL	50-64	sepsis	97	20	0.206186	0.800963	2.10279	24.3454	28
140-179 mg/dL	50-64	viral_disease	12	0	0	0.979685	1.46279
140-179 mg/dL	65-79	brain_injury	30	5	0.166667	0.827114	1.19542	24.8667	28
140-179 mg/dL	65-79	injury_trauma	48	2	0.0416667	0.945314	1.40301
140-179 mg/dL	65-79	neurologic	155	24	0.154839	0.875336	1.44522	25.9548	28
140-179 mg/dL	65-79	organ_failure_heart_kidney_liver	400	42	0.105	0.899461	1.56721	26.4675	28
140-179 mg/dL	65-79	post_surgery	6	0	0	0.94418	1.22107
140-179 mg/dL	65-79	psychologic	261	15	0.0574713	0.934589	1.34466	26.9981	28
140-179 mg/dL	65-79	sepsis	190	31	0.163158	0.832633	1.90303	25.4316	28
140-179 mg/dL	65-79	viral_disease	13	0	0	0.994839	1.54409
140-179 mg/dL	≥80	brain_injury	20	7	0.35	0.68234	1.24066	19.725	28
140-179 mg/dL	≥80	injury_trauma	27	3	0.111111	0.912	1.57333
140-179 mg/dL	≥80	neurologic	88	17	0.193182	0.782284	1.46465	24.1932	28
140-179 mg/dL	≥80	organ_failure_heart_kidney_liver	193	26	0.134715	0.844265	1.53457	25.4896	28
140-179 mg/dL	≥80	psychologic	93	10	0.107527	0.906987	1.2433	26.0269	28
140-179 mg/dL	≥80	sepsis	69	13	0.188406	0.821873	1.60132	25.1957	28
140-179 mg/dL	≥80	viral_disease	10	0	0	0.997355	1.21641
180+ mg/dL	<50	brain_injury	5	2	0.4	0.784883	1.76451
180+ mg/dL	<50	injury_trauma	4	0	0	0.993056	1.51505
180+ mg/dL	<50	neurologic	10	2	0.2	0.836046	1.61107
180+ mg/dL	<50	organ_failure_heart_kidney_liver	30	4	0.133333	0.844435	1.97624
180+ mg/dL	<50	post_surgery	1	0	0	1	0.36881
180+ mg/dL	<50	psychologic	28	2	0.0714286	0.959593	1.73285
180+ mg/dL	<50	sepsis	16	3	0.1875	0.805867	2.44395
180+ mg/dL	<50	viral_disease	5	0	0	0.994444	2.184
180+ mg/dL	50-64	brain_injury	7	0	0	0.983496	1.10538
180+ mg/dL	50-64	injury_trauma	13	1	0.0769231	0.877943	1.95153
180+ mg/dL	50-64	neurologic	34	3	0.0882353	0.930319	1.61273
180+ mg/dL	50-64	organ_failure_heart_kidney_liver	94	6	0.0638298	0.933396	1.87332	27.1223	28
180+ mg/dL	50-64	post_surgery	3	1	0.333333	0.853939	1.87592
180+ mg/dL	50-64	psychologic	98	5	0.0510204	0.943643	1.69094	27.3724	28
180+ mg/dL	50-64	sepsis	52	7	0.134615	0.86159	2.19148	25.7308	28
180+ mg/dL	50-64	viral_disease	7	0	0	0.999514	1.89615
180+ mg/dL	65-79	brain_injury	19	4	0.210526	0.826775	1.64654
180+ mg/dL	65-79	injury_trauma	36	1	0.0277778	0.969128	1.5688
180+ mg/dL	65-79	neurologic	76	6	0.0789474	0.946054	1.61888	26.2895	28
180+ mg/dL	65-79	organ_failure_heart_kidney_liver	153	15	0.0980392	0.900039	2.15044	26.0752	28
180+ mg/dL	65-79	post_surgery	5	0	0	0.999515	1.50861
180+ mg/dL	65-79	psychologic	123	8	0.0650407	0.953024	1.53586	26.8171	28
180+ mg/dL	65-79	sepsis	90	10	0.111111	0.873864	2.45841	25.7667	28
180+ mg/dL	65-79	viral_disease	15	0	0	0.997323	1.63019
180+ mg/dL	≥80	brain_injury	8	4	0.5	0.656458	1.25847
180+ mg/dL	≥80	injury_trauma	19	1	0.0526316	0.977122	1.66217
180+ mg/dL	≥80	neurologic	50	7	0.14	0.860859	1.52126	24.78	28
180+ mg/dL	≥80	organ_failure_heart_kidney_liver	90	12	0.133333	0.845803	1.62319	25.5333	28
180+ mg/dL	≥80	post_surgery	1	0	0	1	1.29726
180+ mg/dL	≥80	psychologic	57	4	0.0701754	0.916707	1.51827
180+ mg/dL	≥80	sepsis	45	10	0.222222	0.742857	1.79255	23.4111	28
180+ mg/dL	≥80	viral_disease	5	0	0	0.993333	1.74126
<100 mg/dL	<50	brain_injury	11	0	0	0.999189	1.03296
<100 mg/dL	<50	injury_trauma	33	0	0	0.999438	1.04627
<100 mg/dL	<50	neurologic	43	1	0.0232558	0.973042	0.927767
<100 mg/dL	<50	organ_failure_heart_kidney_liver	69	3	0.0434783	0.970014	0.991572
<100 mg/dL	<50	psychologic	116	2	0.0172414	0.986369	0.903084
<100 mg/dL	<50	sepsis	51	4	0.0784314	0.923682	1.42179
<100 mg/dL	<50	viral_disease	25	0	0	0.998804	0.94404
<100 mg/dL	50-64	brain_injury	11	0	0	0.987182	0.871968
<100 mg/dL	50-64	injury_trauma	13	1	0.0769231	0.916217	1.1291
<100 mg/dL	50-64	neurologic	34	4	0.117647	0.898864	0.921155
<100 mg/dL	50-64	organ_failure_heart_kidney_liver	88	6	0.0681818	0.944813	0.941347	26.6818	28
<100 mg/dL	50-64	post_surgery	1	0	0	1	1.00254
<100 mg/dL	50-64	psychologic	91	3	0.032967	0.981075	0.862308
<100 mg/dL	50-64	sepsis	44	5	0.113636	0.891643	1.1528	25.4659	28
<100 mg/dL	50-64	viral_disease	12	0	0	0.997285	0.929324
<100 mg/dL	65-79	brain_injury	9	1	0.111111	0.935465	0.844383
<100 mg/dL	65-79	injury_trauma	29	1	0.0344828	0.975638	1.02193
<100 mg/dL	65-79	neurologic	56	0	0	0.992122	0.884502
<100 mg/dL	65-79	organ_failure_heart_kidney_liver	113	3	0.0265487	0.962325	1.12433
<100 mg/dL	65-79	post_surgery	1	0	0	0.997573	1.06394
<100 mg/dL	65-79	psychologic	124	1	0.00806452	0.995311	0.881486
<100 mg/dL	65-79	sepsis	60	3	0.05	0.936652	1.30406
<100 mg/dL	65-79	viral_disease	13	0	0	0.999627	0.897583
<100 mg/dL	≥80	brain_injury	3	1	0.333333	0.651999	0.695335
<100 mg/dL	≥80	injury_trauma	28	1	0.0357143	0.959277	0.898456
<100 mg/dL	≥80	neurologic	66	3	0.0454545	0.978719	0.921215
<100 mg/dL	≥80	organ_failure_heart_kidney_liver	96	5	0.0520833	0.959914	0.887106	26.8125	28
<100 mg/dL	≥80	post_surgery	5	0	0	0.985889	0.801909
<100 mg/dL	≥80	psychologic	75	1	0.0133333	0.981092	0.840102
<100 mg/dL	≥80	sepsis	55	6	0.109091	0.91061	1.16353	25.5182	28
<100 mg/dL	≥80	viral_disease	6	0	0	0.998624	0.792663
Table presents stratified GlucosSurvAI analyses of major ICU admission reasons, including sepsis, organ failure, neurologic conditions, brain injury, trauma, psychological conditions, viral disease, and post-surgical status; across glycemic bins and age categories. For each subgroup, event rates, GlucoSurvAI-predicted mortality probability, Cox hazard estimates, and RMST are provided. These resul…
