# Supplementary material for: First-Day Glycemic Exposure and 28-Day Mortality in the ICU: A Multicohort Study
Source: Research Square preprint supplement (doi:10.21203/rs.3.rs-9710742/v1), 2026-06-11
Supplement: Supplementary file 3 [file d141c3d827cc7c4fb9a88c33.docx]

**eAppendix: Expanded Discussion**

Interpretation of early glycemic exposure in critical illness must be considered in light of prior interventional evidence. Initial single-center randomized trials suggested mortality reduction with intensive insulin therapy targeting near-normoglycemia (80–110 mg/dL).1 However, the large multicenter NICE-SUGAR trial demonstrated increased 90-day mortality with intensive glucose control (81–108 mg/dL) compared with a conventional target of ≤ 180 mg/dL.2 Severe hypoglycemia was markedly more frequent in the intensive group, and the trial concluded that aggressive normalization was harmful.2

These findings fundamentally reshaped ICU glycemic practice. Contemporary guidance emphasizes moderate targets and prioritizes avoidance of hypoglycemia and minimization of glycemic variability.3,4 Importantly, NICE-SUGAR evaluated treatment targets in a randomized design, whereas the present study evaluates first-day glycemic exposure patterns and early risk stratification within observational ICU data.

Our findings do not advocate intensive glucose normalization. Rather, exposure-aware first-day TWAG analysis identified a risk gradient beginning at sustained levels ≥ 140 mg/dL, while values between 100–139 mg/dL were associated with the most favorable adjusted survival. This range is narrower than conventional upper targets but does not imply that active reduction to near-normoglycemia improves outcomes. Instead, it suggests that early glycemic burden may function as a risk marker, identifying patients with higher physiologic stress or treatment complexity. Although maintaining glucose within specific ranges cannot be inferred to improve outcomes, the observed associations highlight candidate targets for future interventional studies.

Given the history of harm from overinterpretation of glycemic signals in critical care, we explicitly separated early prediction from retrospective association analyses. Prediction models were restricted to data available within the first 24 hours of ICU admission, whereas extended Cox models incorporating treatment variables were framed as conditional associations rather than causal or prospective prediction tools. This strict temporal alignment was implemented to minimize information leakage and avoid conflating prognostic modeling with treatment effect inference.

In contrast to NICE-SUGAR, which evaluated treatment targets in a randomized design, our analyses examine exposure-associated risk and early prognostic modeling without inferring causal benefit from glucose reduction.2

**References**

1. van den Berghe G, Wouters P, Weekers F, et al. Intensive insulin therapy in critically ill patients. *N Engl J Med*. Nov 8 2001;345(19):1359-67. doi:10.1056/NEJMoa011300

2. Investigators N-SS, Finfer S, Chittock DR, et al. Intensive versus conventional glucose control in critically ill patients. *N Engl J Med*. Mar 26 2009;360(13):1283-97. doi:10.1056/NEJMoa0810625

3. American Diabetes Association Professional Practice C. 16. Diabetes Care in the Hospital: Standards of Care in Diabetes-2024. *Diabetes Care*. Jan 1 2024;47(Suppl 1):S295-S306. doi:10.2337/dc24-S016

4. Finfer S, Wernerman J, Preiser JC, et al. Clinical review: Consensus recommendations on measurement of blood glucose and reporting glycemic control in critically ill adults. *Crit Care*. Jun 14 2013;17(3):229. doi:10.1186/cc12537
